## **A clock in mouse cones contributes to the retinal oscillator network and to synchronization of the circadian system**

Cristina Sandu<sup>1\*#</sup>, Prapimpun Wongchitrat<sup>2\*</sup>, Nadia Mazzaro<sup>1</sup>, Catherine Jaeger<sup>1</sup>, Hugo Calligaro<sup>1</sup>, Jorge Mendoza<sup>1</sup>, David Hicks<sup>1</sup>, Marie-Paule Felder-Schmittbuhl<sup>1#</sup>

<sup>1</sup> Centre National de la Recherche Scientifique, Université de Strasbourg, Institut des Neurosciences Cellulaires et Intégratives, 67000 Strasbourg, France

<sup>2</sup> Center for Research and Innovation, Faculty of Medical Technology, Mahidol University, 73170 Salaya, Nakhon Pathom, Thailand

\* Equal contribution

# Corresponding authors : [feldermp@inci-cnrs.unistra.fr](mailto:feldermp@inci-cnrs.unistra.fr); [sandu@inci-cnrs.unistra.fr](mailto:sandu@inci-cnrs.unistra.fr)

**Key Words:** Nrl, cone, circadian rhythm, phase resetting, retinal clock, negative masking

**Abbreviations:** Cnga3, Cyclic Nucleotide Gated Channel Subunit Alpha 3; Crx, Cone-Rod Homeobox.

1 ***Abstract***

2

3 Multiple circadian clocks dynamically regulate mammalian physiology. In retina, rhythmic  
4 gene expression serves to align vision and tissue homeostasis with daily light changes. Photic  
5 input is relayed to the suprachiasmatic nucleus to entrain the master clock, which matches  
6 behaviour to environmental changes. Circadian organization of the mouse retina involves  
7 coordinated, layer-specific oscillators, but so far little is known about the cone photoreceptor  
8 clock and its role in the circadian system. Using the cone-only *Nrl*<sup>-/-</sup> mouse model we show  
9 that cones contain a functional self-sustained molecular clockwork. By bioluminescence-  
10 combined imaging we also show that cones provide substantial input to the retinal clock  
11 network. Furthermore, we found that light entrainment and negative masking in cone-only  
12 mice are subtly altered and that constant light displayed profound effects on their central  
13 clock. Thus, our study demonstrates the contribution of cones to retinal circadian organisation  
14 and their role in finely tuning behaviour to environmental conditions.

15

## 16 **Introduction**

17 Adaptation of behaviour and physiology to the 24 h light/dark (LD) cycle produced by the  
18 Earth's rotation around its axis is one of the main constraints affecting living organisms. Such  
19 adaptation is mediated by the circadian system, a network of tissue/cell-specific oscillators  
20 with an internal period close to (circa) 24 h, which in mammals is coordinated by a master  
21 clock located in the hypothalamic suprachiasmatic nuclei (SCN) (for review: (Hastings,  
22 Maywood, & Brancaccio, 2019)). Daily behavioural and physiological rhythms are controlled  
23 by cell autonomous molecular oscillators constituted of oscillating auto-regulatory clock  
24 transcription factors able to drive gene expression programs, hence cellular physiology. The  
25 retina plays a particular role in the circadian system in mammals because it is responsible for  
26 the unique photosensory input to ensure entrainment of the clock in the SCN to the LD cycle  
27 (Yamazaki, Goto, & Menaker, 1999).

28  
29 The retina was the first circadian clock identified outside the SCN, based on the capacity of  
30 explanted tissue from hamsters to secrete melatonin in a rhythmic manner (Tosini & Menaker,  
31 1996). Since the retinal clock is able to synchronize to the LD cycle *in vitro*, this tissue  
32 constitutes on its own a complete circadian system, with molecular clock machinery, resetting  
33 input mechanism and biological outputs (Felder-Schmittbuhl et al., 2018; McMahon, Iuvone,  
34 & Tosini, 2014). Besides melatonin synthesis the retina displays a plethora of rhythmic  
35 properties, including expression of photopigment genes, processing of light information,  
36 phagocytosis of photoreceptor outer segments, metabolism, together contributing to adapt  
37 visual function to the LD cycle and ensuring tissue homeostasis (for review (Felder-  
38 Schmittbuhl, Calligaro, & Dkhissi-Benyahya, 2017)). Given the complexity of the retinal  
39 tissue comprising glial cells and six major types of neurons, identification of the cell type(s)  
40 constituting its main oscillator has been a matter of debate. Analysis of clock gene expression

41 *in vitro* and *ex vivo* suggested that the retina is composed of several layer-specific, coupled  
42 oscillators (Dkhissi-Benyahya et al., 2013; Jaeger et al., 2015; Sandu, Hicks, & Felder-  
43 Schmittbuhl, 2011) but the existence/identity of a main driver remains under question. Several  
44 lines of evidence, notably the presence of melatonin synthesis machinery (Gianesini, Clesse,  
45 Tosini, Hicks, & Laurent, 2015; Niki et al., 1998), the detection of cycling clock factors (Liu,  
46 Zhang, & Ribelayga, 2012), have pointed to cones as a potential retinal clock component but  
47 their precise contribution to the network has not been evaluated.

48 The retina possesses a laminar organisation as well as parallel microcircuits processing light  
49 information. Photon capture occurs in photoreceptors, highly specialized cells located in the  
50 outer retina. Cones respond to bright light (photopic vision) and mediate color vision whereas  
51 rods are much more sensitive and function under low intensities (scotopic vision). In mice,  
52 most cones (95%) are M-cones which express 2 types of opsins (short wavelength - sws, with  
53 maximal sensitivity at 360 nm and middle wavelength – mws, with peak sensitivity at 509  
54 nm) and a minority of these cones express either the blue or the green opsin alone respectively  
55 in the ventral and dorsal regions of the retina (Applebury et al., 2000; Hughes, Watson,  
56 Foster, Peirson, & Hankins, 2013). Investigation of cone properties has been challenging  
57 given their low number in retinas of routinely used laboratory mammals, i.e., <3% of total  
58 photoreceptors in mice (Jeon, Strettoi, & Masland, 1998) and <1% in rats (Szel & Rohlich,  
59 1992). The *Nrl*<sup>-/-</sup> mouse (Mears et al., 2001), in which absence of the NRL transcription factor  
60 totally blunts rod generation, has a cone-only retina with a majority of S-cones, and has been  
61 extensively used to study cone properties without the interference from rods (Krigel, Felder-  
62 Schmittbuhl, & Hicks, 2010; Liu et al., 2012; Wenzel et al., 2007).

63

64 Studies from the last 20 years have led to improved understanding of how information linked  
65 to light perception in the eye is conveyed to the SCN and translated into a message reflecting

66 the alternation of day and night, able to entrain the central clock. In particular, a minor, light-  
67 sensitive population of retinal ganglion cells (RGC) expressing the melanopsin photopigment  
68 (intrinsically photosensitive RGC or ipRGC) constitutes the (unique) cellular connection  
69 between the retina and the SCN (Goz et al., 2008; Guler et al., 2008; Hatori et al., 2008).  
70 Despite the major role played by these blue sensors (peak sensitivity = 480 nm), some data  
71 demonstrate a role for rods in synchronisation to the LD cycle at low light intensities (Altimus  
72 et al., 2010; Boudard, Mendoza, & Hicks, 2009; Lall et al., 2010) and also for cones (Dkhis-  
73 Benyahya, Gronfier, De Vanssay, Flamant, & Cooper, 2007; van Diepen, Ramkisoensing,  
74 Peirson, Foster, & Meijer, 2013; van Oosterhout et al., 2012). In addition, recent results in  
75 mice suggested that cones also play a role in entrainment mechanisms by perceiving spectral  
76 changes characteristic of dusk or dawn (Mouland, Martial, Watson, Lucas, & Brown, 2019;  
77 Walmsley et al., 2015). However, these functions have not been investigated with gain of  
78 function mutants, in particular for cones.

79 Here we investigate the role of murine cones in the circadian system. We show that cones in  
80 the *Nrl*<sup>-/-</sup> retina harbor a functional molecular clock, the elements of which are similar to other  
81 central or peripheral clocks. Furthermore, the cone population contributes, together with the  
82 inner and ganglion cell layers, to the oscillatory network of the retina. However, light-  
83 mediated behavior seems to be altered in the cone-only retina from *Nrl* mutant mice in acute  
84 and chronic light exposure conditions, particularly at low light intensities. This suggests that  
85 total replacement of rods by cones induces modifications in the global non-image forming  
86 visual function of the retina in mice.

87

## 88 **Results**

### 89 **A functional clock in cone photoreceptors**

90 We first aimed to characterize the cone molecular clock on microdissected photoreceptors  
91 isolated from the *Nrl* KO mice over 24 h in DD (Figure 1A). We found that all core clock  
92 gene transcripts examined, *Bmal1*, *Clock*, *Per1*, *Per2*, *Per3*, *Cry1*, *Cry2*, *Rev-Erba*, *Rorβ* are  
93 expressed in cones (Figure 1B, top panel). Significant rhythmic levels of expression were  
94 determined for *Bmal1*, *Per1*, *Per2*, *Per3*, *Rev-Erba* (Table 1). Interestingly, the expression  
95 profile of *Bmal1* was in opposite phase in comparison to the profiles of *Per* transcripts, as  
96 described in the SCN (King & Takahashi, 2000; Welsh, Takahashi, & Kay, 2010) and other  
97 peripheral tissues such as liver (Noguchi et al., 2010; Oishi, Sakamoto, Okada, Nagase, &  
98 Ishida, 1998). 24 h profiles in cones were also similar, at least for *Bmal1* and *Per1* transcripts,  
99 to those reported for mouse whole retinas sampled in DD (Ruan, Allen, Yamazaki, &  
100 McMahon, 2008).

101 We also investigated the expression of several well-known or putative target genes of the  
102 retinal clock such as *S-opsin*, *M-opsin*, *Crx*, *arrestin 3*, *Cnga3* and *c-Fos* transcripts (Figure 1  
103 B, lower panel). *S-opsin*, *arrestin 3* and *Cnga3*, expressed in S-cones (Mears et al., 2001),  
104 displayed significantly rhythmic profiles (Table 1).

105 To further evaluate the capacity of cones to sustain rhythmicity, we used a vibratome-based  
106 sectioning of the retina to isolate photoreceptor (cone-only) layers from the KO mice raised  
107 on the *Per2<sup>Luc</sup>* reporter background (Yoo et al., 2004) for real-time bioluminescence  
108 recordings. Photoreceptor layers from WT mice were used as control. As previously described  
109 (Jaeger et al., 2015) the latter showed robust PER2::LUC oscillations with a  $26.46 \pm 0.02$  h  
110 period (Figure 1C). Cone layers from the KO retinas also proved robustly rhythmic in culture,  
111 but yet with a significantly longer period:  $29.07 \pm 0.03$  h ( $n = 6$  for WT,  $n = 9$  for KO;  
112 genotype effect:  $p = 0.018$ ) (Figure 1C).

113 Finally, we examined how cone layers oscillate within the context of the whole retina by  
114 using in vitro real-time bioluminescence combined with imaging. 100  $\mu\text{m}$  transversal sections  
115 were cut using the vibratome technique illustrated in Figure 1D, transferred on a  
116 semipermeable membrane, then cultured and imaged for several days in a temperature  
117 controlled microscope chamber. PER2 bioluminescence signal emerged from all layers, with  
118 higher intensity in ganglion and inner cell layers and weaker signal in the outer, photoreceptor  
119 layer (Figure 1E). Moreover, the PER2 signal was rhythmic in all layers (Figure 1F), with  
120 distinct free-run periods ( $24.28 \pm 0.26$  h for ganglion cell layers,  $27.79 \pm 0.20$  h for inner  
121 nuclear layers and  $26.80 \pm 1.19$  h for photoreceptor layers; Figure 1G) (significant layer  
122 effect,  $p = 0.037$ ). Taken together, these data confirm the presence of an autonomous clock in  
123 cones.

124

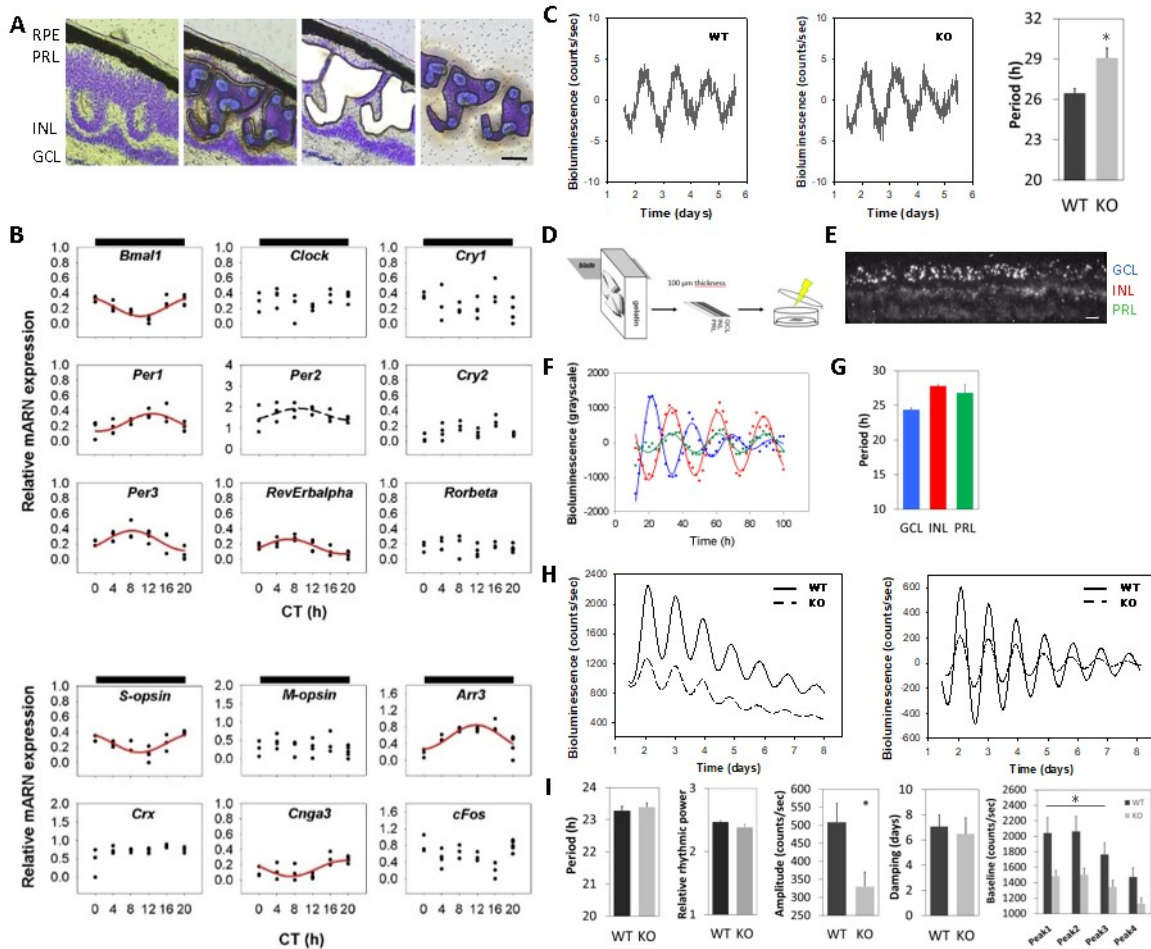

125

## 126 **Figure 1: Circadian rhythms in cones and cone-only retinas**

127 (A-C) A functional clock in cone photoreceptors. (A) Cone photoreceptors were  
 128 microdissected from retinas of *Nrl*<sup>-/-</sup> mice sampled throughout 24 h in constant dark. The  
 129 successive pictures show, from left to right: the characteristic structure of a cresyl-violet  
 130 stained retinal section from these 1.5 month *Nrl*<sup>-/-</sup> mice with numerous rosettes; the  
 131 capture/sectioning strategy; the same section after laser cut; the resulting captured sample.  
 132 The distinct retinal layers (GCL, ganglion cell layer; INL, inner nuclear layer; PRL,  
 133 photoreceptor layer) and the retinal pigmented epithelium (RPE) are indicated (scale bar = 50  
 134 μm). (B) Circadian expression profiles of clock genes (top) and clock output genes (bottom)  
 135 in microdissected cone layers sampled every 4 h in DD (CT = Circadian Time, corresponding  
 136 to projected ZT). Expression was analysed by qRT-PCR (data for each sample are presented  
 137 as relative expression level with respect to a WT photoreceptor calibrator: n = 3-5 per time  
 138 point). Traces represent the best-fitted sinusoidal regressions supporting rhythmic gene  
 139 expression in the cases where both cosinor analysis and ANOVA yielded significant *p* values.  
 140 Dashed lines when only cosinor proved significant. Results from statistical analyses are  
 141 shown in Table 1 and Figure1- figure supplement 1. (C) PER2::LUC rhythms in explanted



142 cone layers. Graphs show representative (baseline-subtracted) bioluminescence recordings of  
143 photoreceptor layers isolated by vibratome sectioning from WT (left) and KO (right) mice.  
144 Periods of oscillations proved significantly longer in mutants (n = 6 for WT, n = 9 for KO; t-  
145 test,  $p = 0.018$ ). (D-G) Bioluminescence imaging of retinal transversal section from *Nrl*<sup>-/-</sup> mice  
146 reveals sustained oscillation capacity in cones. (D) Schematic presentation of the vibratome-  
147 based strategy for isolating a transversal 100  $\mu\text{m}$  thick section from a freshly dissected retina.  
148 (E) Representative picture showing bioluminescence emission in the 3 neuronal layers from a  
149 *Nrl*<sup>-/-</sup> section (exposure time = 2 h, scale bar = 100  $\mu\text{m}$ ). (F) Representative bioluminescence  
150 counts from the 3 neuronal layers taken individually in one *Nrl*<sup>-/-</sup> sample. Damped sinusoids  
151 represent the best-fit to subtracted data. (G) Periods were calculated separately for each cell  
152 layer and show a significant layer effect (n = 3,  $p = 0.037$ ). (H,I) Circadian rhythms are  
153 altered in a cone-only retina. (H) Representative raw (left) and baseline-subtracted (right)  
154 bioluminescence recordings from WT (solid line) and KO (dashed line) whole retinas  
155 showing reduced baseline and amplitude of the cone-only, mutant retinas. (I) Period, relative  
156 rhythmic power, amplitude, damping and baseline levels were compared between WT and  
157 mutant retinas and revealed a significant difference in amplitude (t-test,  $p = 0.013$ ) and  
158 baseline levels (repeated measures 2-way ANOVA,  $p = 0.015$ ) between genotypes (n = 12 per  
159 genotype). Results are represented as mean  $\pm$  SEM. \*:  $p < 0.05$ .

---

160

161 **Figure 1-Source Data 1: Raw data of results shown in Figure 1**

162 **Figure 1-figure supplement 1: Power calculation for cosinor test and ANOVA of gene**  
163 **expression results**

164 **Figure 1-figure supplement 2: No major change in retinal cell types besides**  
165 **photoreceptors in *Nrl*<sup>-/-</sup> mice**

166

167

168

| Gene            | $p_{\text{cosinor}}$ | $F_{\text{cosinor}}$ | a     | $p_a$   | b     | $p_b$   | c     | $p_c$   | $p_{\text{ANOVA}}$ | $F_{\text{ANOVA}}$ |
|-----------------|----------------------|----------------------|-------|---------|-------|---------|-------|---------|--------------------|--------------------|
| <i>Bmal1</i>    | <0.0001              | F(2, 19) = 19.29     | 0.221 | <0.0001 | 0.123 | <0.0001 | 22.13 | <0.0001 | <0.001             | F(5, 21) = 12.89   |
| <i>Clock</i>    | 0.1851               | F(2, 19) = 1.84      | 0.303 | <0.0001 | 0.062 | 0.07    | 21.58 | <0.0001 | 0.21               | F(5, 21) = 1.63    |
| <i>Cry1</i>     | 0.9489               | F(2, 19) = 0.05      | 0.248 | <0.0001 | 0.015 | 0.74    | 21.82 | 0.0866  | 0.12               | F(5, 21) = 2.08    |
| <i>Cry2</i>     | 0.1435               | F(2, 19) = 2.15      | 0.132 | <0.0001 | 0.054 | 0.05    | 12.38 | <0.0001 | 0.006              | F(5, 21) = 5.09    |
| <i>Per1</i> *   | 0.0014               | F(2, 19) = 9.75      | 0.245 | <0.0001 | 0.115 | 0.0003  | 12.81 | <0.0001 | 0.02               | F(5, 20) = 12.90   |
| <i>Per2</i> *   | 0.0326               | F(2, 19) = 4.17      | 1.653 | <0.0001 | 0.286 | 0.0098  | 8.99  | <0.0001 | 0.22               | Eqvar failed       |
| <i>Per3</i> *   | 0.001                | F(2, 19) = 10.41     | 0.245 | <0.0001 | 0.13  | 0.0002  | 8.25  | <0.0001 | 0.007              | F(5, 20) = 4.94    |
| <i>Rev-Erba</i> | <0.0001              | F(2, 19) = 17.56     | 0.168 | <0.0001 | 0.096 | <0.0001 | 6.72  | <0.0001 | 0.001              | F(5, 21) = 7.22    |
| <i>Rorb</i>     | 0.6356               | F(2, 19) = 0.46      | 0.161 | <0.0001 | 0.023 | 0.34    | 2.94  | 0.45    | 0.71               | F(5, 21) = 0.585   |

|                   |         |                  |       |         |       |         |       |         |         |                  |
|-------------------|---------|------------------|-------|---------|-------|---------|-------|---------|---------|------------------|
| <i>M-opsin</i>    | 0.6325  | F(2, 19) = 0.47  | 0.324 | <0.0001 | 0.06  | 0.34    | 7.09  | 0.09    | 0.49    | F(5, 21) = 0.489 |
| <i>S-opsin</i>    | <0.0001 | F(2, 19) = 16.47 | 0.252 | <0.0001 | 0.12  | <0.001  | 21.94 | <0.0001 | <0.0001 | F(5, 21) = 9.08  |
| <i>Arrestin 3</i> | <0.0001 | F(2, 19) = 17.89 | 0.56  | <0.0001 | 0.288 | <0.0001 | 11.7  | <0.0001 | 0.004   | Norm failed      |
| <i>Cnga3</i>      | 0.003   | F(2, 19) = 8.04  | 0.15  | <0.0001 | 0.103 | 0.0008  | 19.1  | <0.0001 | 0.001   | F(5, 21) = 7.168 |
| <i>Crx</i>        | 0.1929  | F(2, 19) = 1.80  | 0.698 | <0.0001 | 0.099 | 0.07    | 13.35 | <0.0001 | 0.11    | Norm failed      |
| <i>c-Fos</i>      | 0.0809  | F(2, 19) = 2.88  | 0.581 | <0.0001 | 0.169 | 0.03    | 0.06  | 0.9689  | 0.002   | F(5, 21) = 6.635 |

169

170 **Table 1: Cosinor analysis and ANOVA for gene expression results**

171 (a, mesor; b, amplitude; c, acrophase)

172 \* One outlier sample was removed from analysis

173

174

| <b>Gene</b>     | <b>cosinor</b>       | <b>ANOVA</b>         |
|-----------------|----------------------|----------------------|
|                 | Power (alpha = 0.05) | Power (alpha = 0.05) |
| <i>Bmal1</i>    | <b>1</b>             | <b>0.999</b>         |
| <i>Clock</i>    | 0.175                | 0.314                |
| <i>Cry1</i>     | 0.282                | 0.046                |
| <i>Cry2</i>     | <b>0.86</b>          | 0.518                |
| <i>Per1</i> *   | 0.675                | <b>0.971</b>         |
| <i>Per2</i> *   | 0.138                | 0.771                |
| <i>Per3</i> *   | <b>0.834</b>         | <b>0.977</b>         |
| <i>Rev-Erba</i> | <b>0.973</b>         | <b>0.998</b>         |
| <i>Rorβ</i>     | 0.05                 | 0.158                |

|                   |              |              |
|-------------------|--------------|--------------|
| <i>M-opsin</i>    | 0.05         | 0.159        |
| <i>S-opsin</i>    | <b>0.995</b> | <b>0.954</b> |
| <i>Arrestin 3</i> | <b>0.998</b> | <b>0.998</b> |
| <i>Cnga3</i>      | <b>0.972</b> | <b>0.948</b> |
| <i>Crx</i>        | 0.422        | 0.452        |
| <i>c-Fos</i>      | <b>0.956</b> | 0.63         |

175

176 **Figure 1-figure supplement 1: Power calculation for cosinor test and ANOVA of gene**  
177 **expression results**

178 Power values > 0.8 are in bold.

---

179

180

## 181 **Clock properties in a cone-only retina**

182 We then examined how the unique presence of cones affects the overall circadian function in  
183 the mouse retina. Previous bioluminescence studies demonstrated that mouse retina displays  
184 oscillatory expression of PER2 (Jaeger et al., 2015; Ruan et al., 2008). To evaluate how a  
185 cone-only photoreceptor population impacts on the retinal clock we performed real-time  
186 bioluminescence recordings of whole retinal explants from *Nrl<sup>-/-</sup> Per2<sup>Luc</sup>* mice, compared to  
187 WT controls (Figure 1H). Sustained circadian oscillations of PER2 bioluminescence were  
188 observed for several days, with no difference in period ( $p = 0.557$ ), relative rhythmic power ( $p$   
189  $= 0.273$ ) and damping ( $p = 0.583$ ) comparing to the wild-type littermates (Figure 1I).  
190 However, the amplitude of the oscillations was significantly reduced in the mutants by 35% ( $p$   
191  $= 0.013$ ). Moreover, a significant reduction of the baseline levels was observed in mutant  
192 mice as compared to wild-type ( $p = 0.015$ ) (Figure 1H and 1I).

193 To make sure the observed effects were not induced by alterations of other cell types known  
194 to play a role in the retinal clock network, we evaluated whether the *Nrl<sup>-/-</sup>* mutation affected  
195 two retinal cell populations; the intrinsically photosensitive ganglion cells (ipRGC) which  
196 express melanopsin (OPN4) photopigment and the dopaminergic amacrine cells which  
197 express tyrosine hydroxylase (TH). Both total numbers of cells analyzed by immunostaining  
198 ( $p = 0.433$  and  $p = 0.176$ , for OPN4 and TH respectively; Figure 1-figure supplement 2A,B)  
199 and mRNA levels quantified by real-time qRT-PCR of whole retinas ( $p = 0.426$  and  $p =$   
200  $0.156$ , respectively; Figure 1-figure supplement 2C) showed no significant differences  
201 between wild-type and mutant retinas. By contrast, we observed a 2-fold increase in the level  
202 of expression of *Opn1mw* in the *Nrl* mutants ( $p < 0.0001$ ), as previously described (Calligaro  
203 et al., 2019; Mears et al., 2001). Despite normal number and phenotype of dopaminergic cells,  
204 KO retinas displayed altered dopamine metabolism in response to light (Figure 1-figure  
205 supplement 2D), as known for rodless retinas (Nir & Iuvone, 1994). Thus the changes related

206 to rhythms measured in vitro in the *Nrl*<sup>-/-</sup> retinas are likely to result mainly from their specific  
207 photoreceptor composition.  
208

209

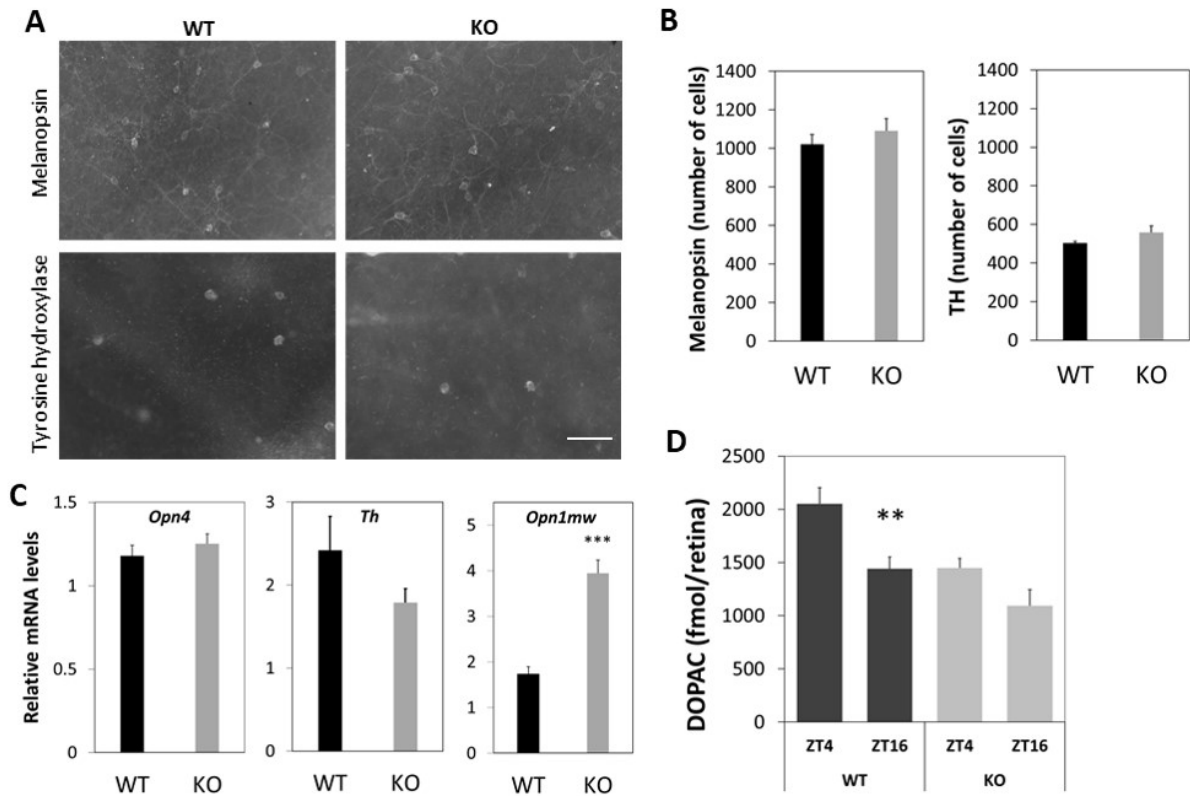

210

211 **Figure 1-figure supplement 2: no major change in retinal cell types besides**  
212 **photoreceptors in *Nrl*<sup>-/-</sup> mice**

213 (A) Immunolabelling of melanopsin (top) and TH (bottom) in whole-mount retinas of the WT  
214 and KO mice. (B) Quantification of melanopsin (left) and TH (right) positive cells in whole-  
215 mount retina. There is no significant difference between control and KO mice (WT n = 5, KO  
216 n = 6;  $p > 0.05$ ). (C) Expression of *Opn4*, *Th* and *Opn1mw* transcripts in whole retina. The  
217 *Opn4* and *Th* levels do not change in the cone-only retinas ( $p > 0.05$ ). The level of *Opn1mw*  
218 increased significantly comparing to WT retinas ( $p < 0.0001$ ) (WT n = 7, KO n = 8). (D)  
219 Diurnal levels of DOPAC in *Nrl* KO mice are no longer rhythmic. DOPAC levels in whole  
220 retinas (n = 6 per group) were measured at ZT4 (day-time) and ZT16 (night-time) and are  
221 affected by genotype and time (2-way ANOVA,  $p = 0.001$  for both). Higher levels of DOPAC  
222 were measured at ZT4 with respect to ZT16 in the wild-type animals but not in *Nrl* mutants  
223 (2-way ANOVA post hoc analysis:  $p = 0.003$  and  $p = 0.07$ , respectively) indicating that the  
224 response to light is altered in the KO retinas, as previously described for rodless mice. Results  
225 are represented as mean  $\pm$  SEM. \*\*:  $p < 0.01$ . \*\*\*:  $p < 0.0001$ .

## 226 **SCN-driven rhythms are preserved in the cone-only mouse**

227 SCN explants from *Nrl*<sup>-/-</sup> *Per2*<sup>Luc</sup> mice produced autonomous and sustained PER2::LUC  
228 oscillations for at least 6 days *in vitro* similar to those from WT (Figure 2A). The robustness  
229 of rhythms was similar between genotypes, based on the relative rhythmic power ( $p = 0.344$ ),  
230 indicating that in the cone-only mutant the master clock is not impaired (Figure 2B).  
231 Moreover, there was no effect on the phase of the oscillations ( $p = 0.938$ ) and on the  
232 amplitude ( $p = 0.476$ ), period ( $p = 0.944$ ) and damping ( $p = 0.09$ ) (Figure 2C-F). Thus, the  
233 SCN clock is not affected by the absence of rods in the standard conditions in which it was  
234 evaluated here.

235 We also recorded wheel-running activity of the *Nrl*<sup>-/-</sup> *Per2*<sup>Luc</sup> mice in order to determine their  
236 circadian phenotype. These behavioral studies were conducted under classical white spectrum  
237 light, to which KO mice respond similarly to WT (Figure 2-figure supplement 1). Activity  
238 profiles (Figure 2G, Figure 2-figure supplement 2) showed no significant differences between  
239 *Nrl* mutants and their wild-type littermates, in LD 12:12, regarding the amount of total  
240 activity ( $13459 \pm 4542$  counts/24 h vs  $15653 \pm 3544$  counts/24 h in WT and KO mice  
241 respectively;  $p = 0.809$ ), the *rho*-phase activity ( $785 \pm 182$  counts/24 h vs  $315 \pm 151$   
242 counts/24 h;  $p = 0.803$ ) and *alpha*-phase activity ( $13221 \pm 4566$  counts/24 h vs  $15338 \pm 3583$   
243 counts/24 h;  $p = 0.748$ ) levels (Figure 2H). The endogenous period was measured under free-  
244 run conditions in DD and showed similar values between WT ( $23.96 \pm 0.10$  h) and KO ( $23.85$   
245  $\pm 0.05$  h) ( $p = 0.278$ ) (Figure 2I).

246

247

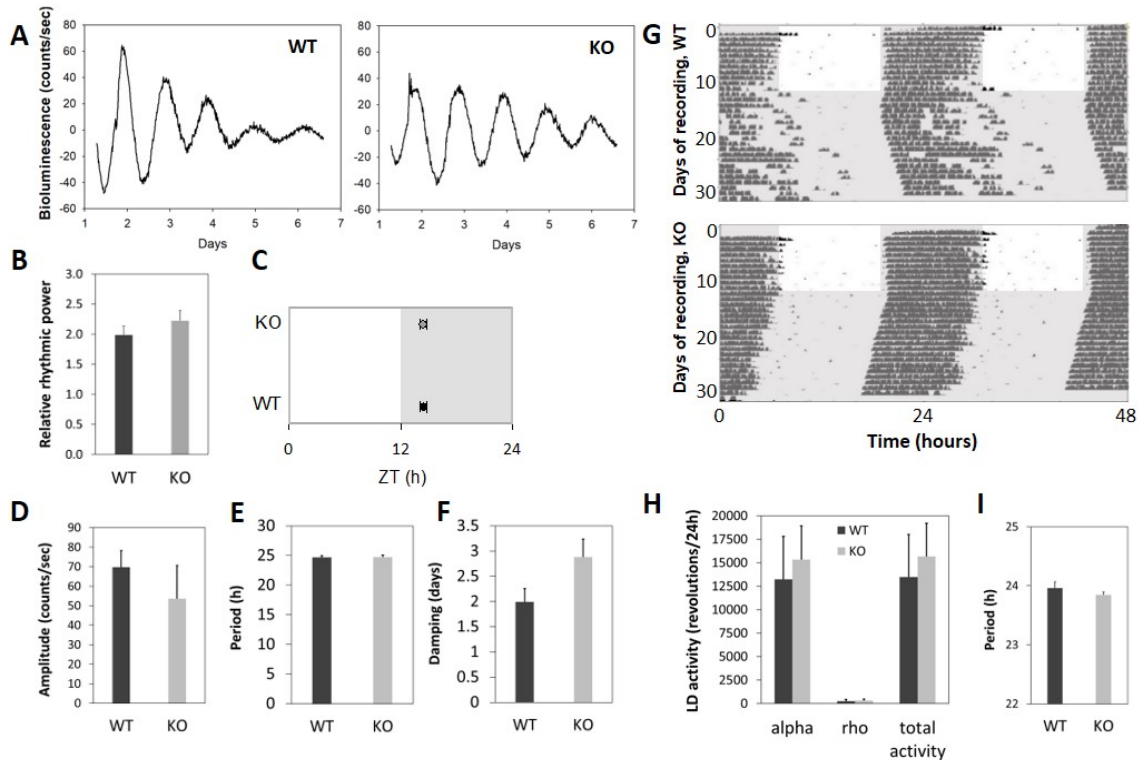

248

249 **Figure 2: The cone-only retina does not affect the endogenous master clockwork**

250 (A-F) The SCN oscillating capacity is not altered in the *Nrl*<sup>-/-</sup> mutant. (A) Representative  
251 PER2::LUC bioluminescence recordings (detrended data) of SCN explants from WT and *Nrl*<sup>-/-</sup>  
252 animals. No genotype effect was observed in the relative rhythmic power (B), phase of first  
253 peak (C; expressed relative to the LD cycle to which animals were previously exposed),  
254 amplitude (D), period (E) and damping (F) (n = 5 for WT, n = 7 for KO). (G-I) Actimetry  
255 recordings (wheel running) of WT and *Nrl*<sup>-/-</sup> mice show no genotype effect in both LD and  
256 DD conditions. (G) Representative actograms of WT (top) and KO (bottom) mice in 12h/12h  
257 LD cycle followed by constant darkness for 20 days. Grey shading indicates darkness. (H)  
258 Quantification of activity during the night-time (alpha), day-time (rho) and total 24 h in LD  
259 recordings, and of the endogenous periods measured in DD (I) showed no difference between  
260 genotypes (n = 4 for WT, n = 7 for KO). Results are represented as mean ± SEM.

261

262 **Figure 2-Source Data 1: Raw data of experiments shown in figure 2**

263 **Figure 2-figure supplement 1: Light-adapted ERG responses in *Nrl*<sup>-/-</sup> mice are similar to  
264 WT.**

265 **Figure 2-figure supplement 2: Additional actograms of WT and KO mice in LD and DD  
266 condition**

267



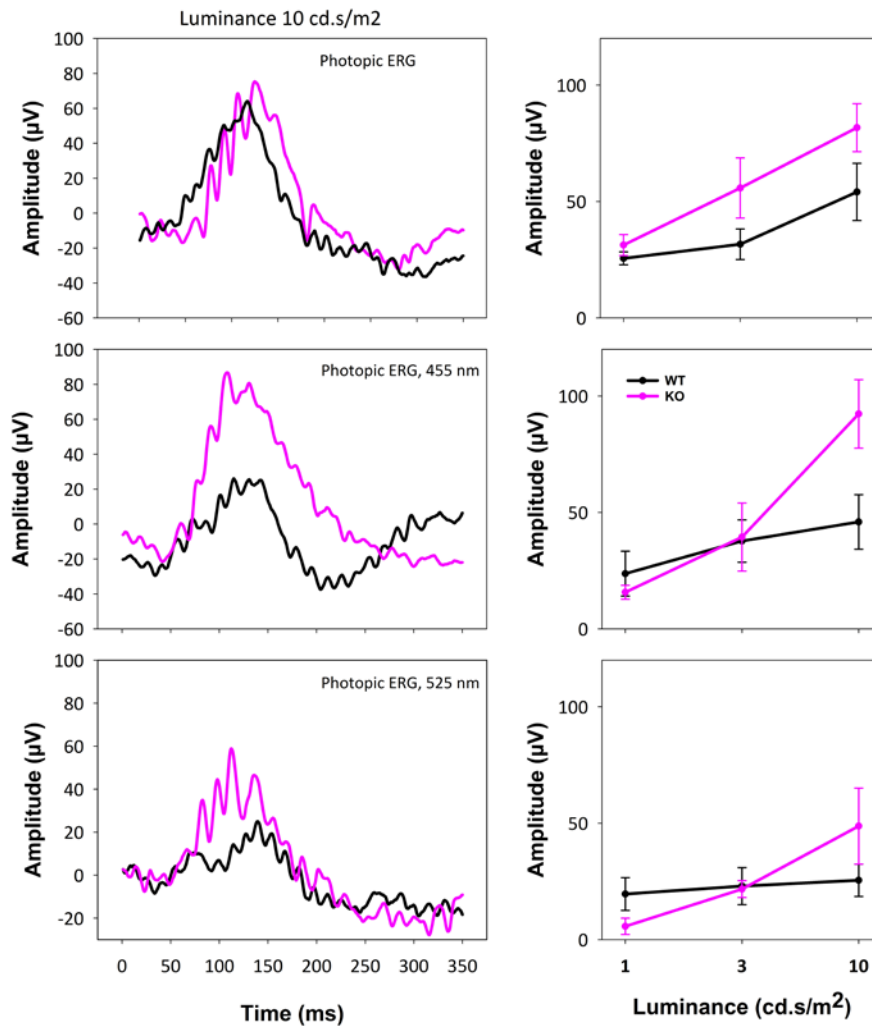

268  
269

270 **Figure 2-figure supplement 1: Light-adapted ERG responses in *Nrl*<sup>-/-</sup> mice are similar to**  
271 **WT.**

272 (A) Representative waveforms of light-adapted ERG responses in photopic condition: white  
273 light (top) and two specific wavelengths - 455 nm (blue; middle) and 525 nm (green; bottom)  
274 - recorded at 10 cd.s/m<sup>2</sup> luminance in 6 week-old KO and WT mice. (B) Response-luminance  
275 curves of light-adapted WT and KO mice to stimuli of 1, 3 and 10 cd.s/m<sup>2</sup> (representative of  
276 cone function) in photopic condition (top) and at two wavelengths: 455 nm (middle) and 525  
277 nm (bottom). The amplitude of b-waves is shown. In all cases two-way repeated measures  
278 ANOVA shows an effect of luminance. There is no genotype effect (n=5 for WT, n=3 for  
279 KO), suggesting comparable responses in WT and KO. However, there is a significant  
280 interaction between luminance and genotype for 455 nm ( $p = 0.015$ ), with an increased  
281 response in KO mice at 10 cd.s/m<sup>2</sup> (post hoc analysis;  $p = 0.014$ ). These results confirm that  
282 KO cones respond to light in the broad white spectrum light to which animals were exposed  
283 in our behavioral studies.

284

## WT

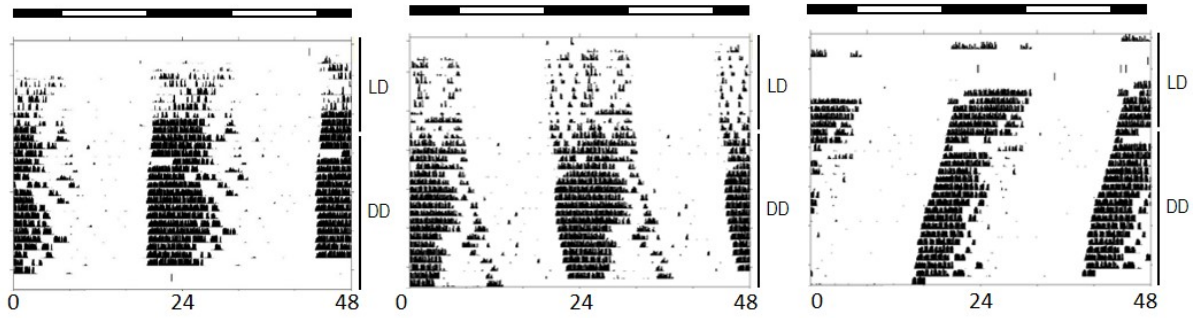

## KO

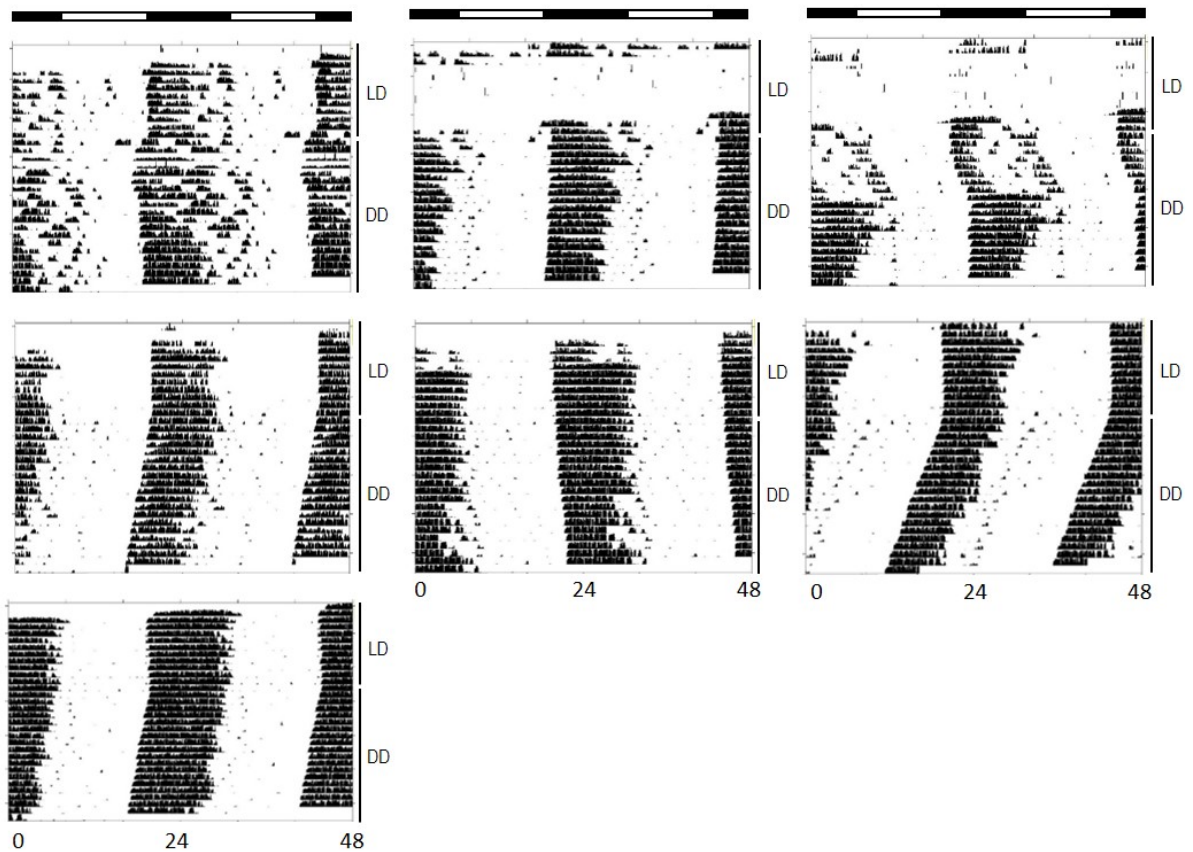

285

286 **Figure 2-figure supplement 2:** Additional actograms of WT and KO mice in LD and DD  
287 condition

288 Wheel-running activity of additional WT and KO mice also used for the analyses presented in  
289 Figure 2H,I. Note that in a few cases some LD data are missing due to technical recording  
290 problems.

291

## 292 **Mild effects of acute light exposure**

293 To evaluate behavioral response to acute light exposure, WT and KO mice were first exposed  
294 to a phase-resetting protocol. Thus, animals received a 15 min light pulse with different  
295 intensities, at the beginning of the constant dark period. Light pulses of high (170-220 lux),  
296 medium (14-20 lux) or low (1.0-1.3 lux) intensities provided at projected ZT15 induced a  
297 phase-delay in the onset of activity of both WT and *Nrl* mutant mice (Figure 3A). The  
298 ANOVA shows a light intensity effect on phase-shifts (2-way ANOVA,  $p = 0.006$ ), but not a  
299 genotype effect ( $p = 0.251$ ) nor an interaction between light intensity and genotype ( $p =$   
300  $0.485$ ) (Figure 3B). This indicates that the response to the 15 min light pulse was not altered  
301 in the absence of rods, at least not down to 1 lux light.

302 Secondly, in the negative masking protocol, a 3 h light pulse applied 2 h after the lights off  
303 inhibited locomotor activity (Figure 3C) with a significant light intensity effect ( $p < 0.001$ )  
304 and an interaction between light intensity and genotype ( $p = 0.004$ ). Mutant animals indeed  
305 showed reduced masking effect at lowest light intensities ( $p < 0.01$  at  $<1$  lux and  $p < 0.001$  at  
306 1-10 lux) (Figure 3D).

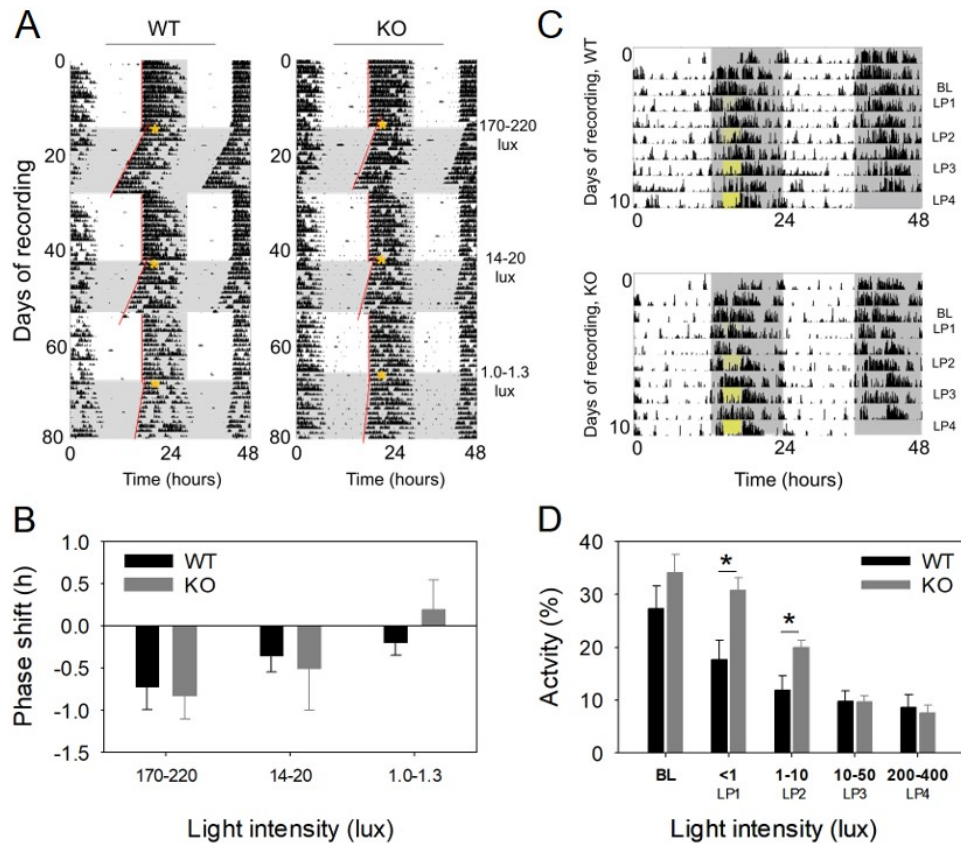

307

### 308 **Figure 3: Acute effects of light in *Nrl*<sup>-/-</sup> mice**

309 (A) Representative actogram of the wheel-running activity of WT (left) and KO (right) mice  
310 following exposure to 15 min light pulses of decreasing intensity given at projected ZT15  
311 (yellow star). Fits to onset of activity used to determine phase shifts are shown in red.  
312 Intensities of the pulse are indicated on the right of actograms. (B) Phase delays decreased  
313 with light intensity (WT n = 5, KO n = 8; 2-way ANOVA,  $p = 0.006$ ) but there was no  
314 genotype effect ( $p = 0.251$ ) nor any interaction with light intensity ( $p = 0.485$ ). (C)  
315 Representative actograms of the general locomotor activity of WT (top) and KO (bottom)  
316 animals in the negative masking experiment when 3 h light pulses were provided at the  
317 beginning of the night phase (ZT14 to ZT17: yellow rectangle) every second day, with  
318 increasing light intensities. (D) Residual activity upon light exposure was expressed relative  
319 to the total activity during the preceding night ( $p < 0.001$ ) and showed significant interaction  
320 between light intensity and genotype ( $p = 0.004$ ) (WT n = 6, KO n = 7). Post hoc analysis  
321 shows significant differences between genotypes for the two lowest stimuli ( $p < 0.01$  at <1 lux  
322 and  $p < 0.001$  at 1-10 lux). Results are represented as mean  $\pm$  SEM. \*:  $p < 0.01$ . Grey shading  
323 indicates darkness.

### 324 **Figure 3-Source data 1: Raw data of experiments shown in figure 3**

325

326 **Nrl<sup>-/-</sup> mice do not re-entrain to phase-shifted LD cycle at low light intensity**

327 Animals were challenged with four successive 6 h phase-delayed LD cycles combined with a  
328 reduction of light intensity (100 lux, 10 lux, 1 lux, 0,1 lux) (Figure 4A, Figure 4-figure  
329 supplement 1). WT animals were able to entrain to each shifted LD cycle at different light  
330 intensities while the KO mice needed longer time to entrain at 1 lux (jet-lag 3,  $p = 0.026$ ) and  
331 were not able to entrain at 0.1 lux (jet-lag 4,  $p < 0.001$ ) even after 50 days (Figure 4B).  
332 Subsequent exposure to total darkness (DD, 22 days) confirmed that almost all mutant  
333 animals were free-running in the previous condition (Figure 4A and Figure 4-figure  
334 supplement 1; data not shown). When animals were subsequently exposed to LD at 100 lux  
335 during the light phase, animals from both genotypes were able to re-entrain (Figure 4B),  
336 confirming that there was no overt loss of visual function.

337

338

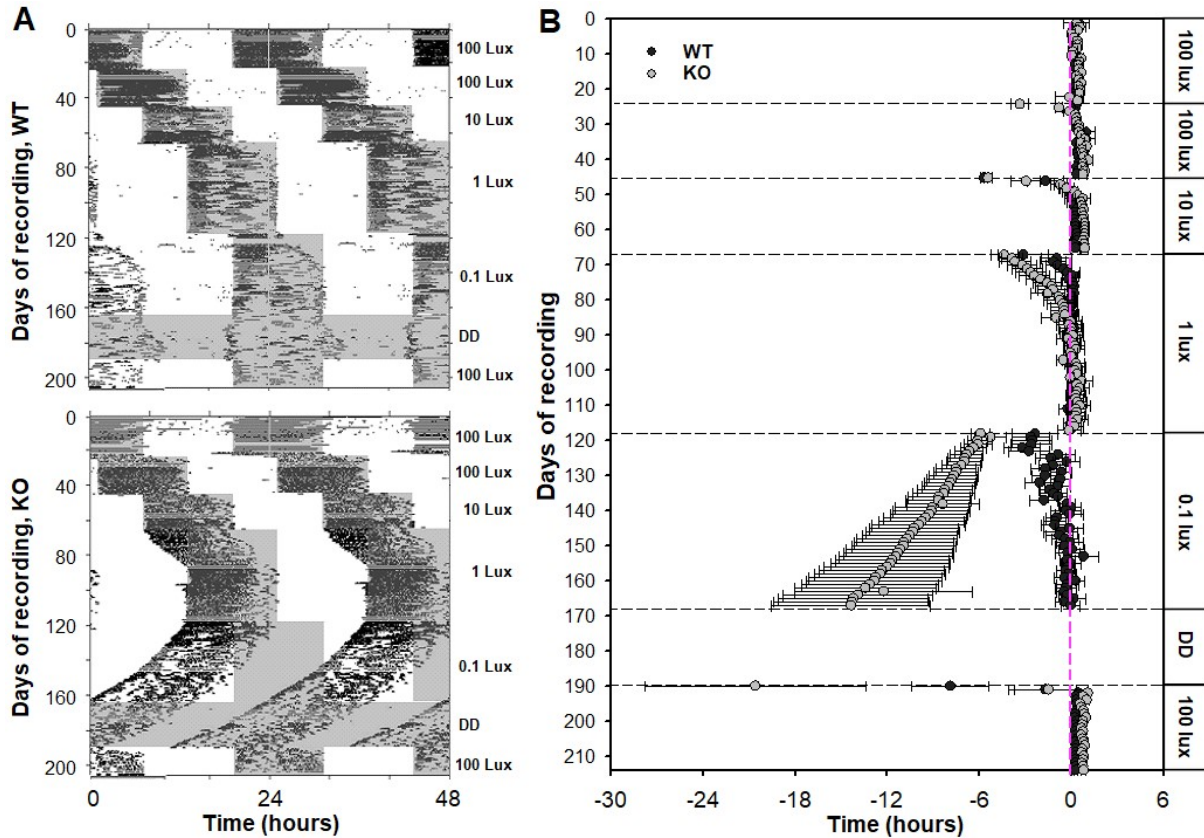

339  
340

341 **Figure 4: Loss of re-entrainment to a 6 h phase delay at low light intensities in the *Nrl*<sup>-/-</sup>**  
342 **mice.**

343 Representative actograms from WT (top) and KO (bottom) animals submitted to successive  
344 6h delayed cycles of 12h light and 12h dark with decreasing intensities (indicated on the right  
345 side of actograms), then to 22 days of DD and finally again to an LD cycle at normal intensity  
346 (100 lux). Grey shading indicates darkness. (B) Onsets of activity expressed relative to ZT0 of  
347 the new LD cycle are shown for each day throughout the entrainment experiment, with  
348 intensities during the light phase or DD exposure (no data in this case) indicated on the right.  
349 *Nrl*<sup>-/-</sup> animals need more time to re-entrain at 1 lux ( $p = 0.026$ ) and do not entrain at all at 0.1  
350 lux ( $p = 0.001$ ) ( $n = 5$  for both WT and KO). Results are represented as mean  $\pm$  SEM.

351 **Figure 4-Source Data 1: Raw data from experiments shown in figure 4**

352 **Figure 4-figure supplement 1: Additional actograms of WT and KO mice in the jet-lag**  
353 **experiment.**

354

WT

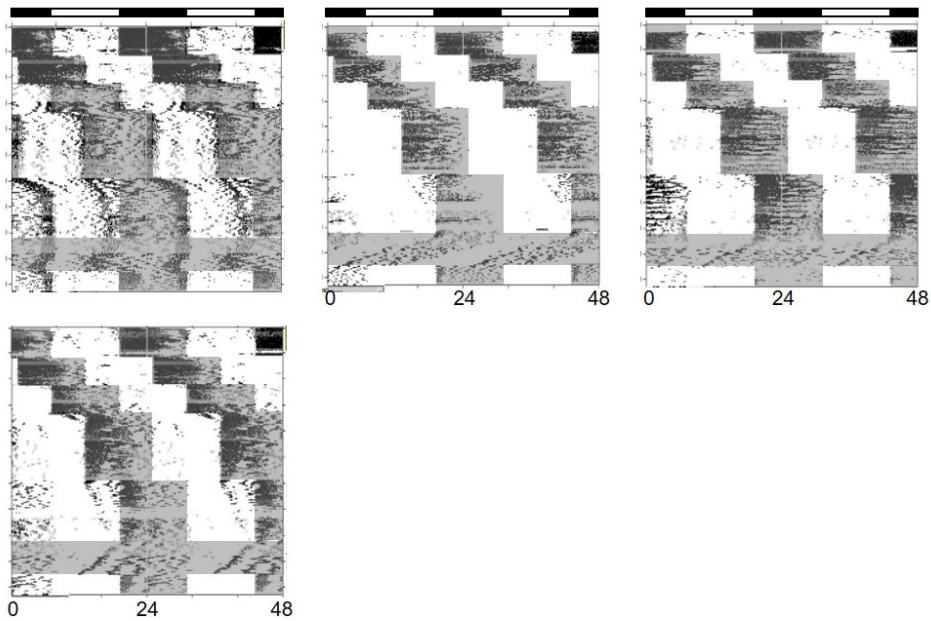

KO

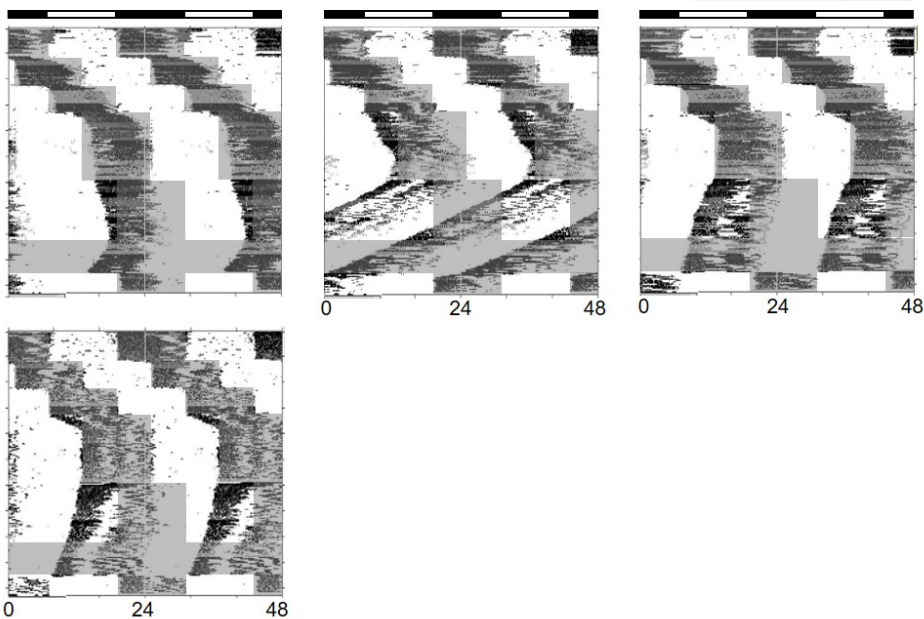

355

356 **Figure 4-figure supplement 1: Additional actograms of WT and KO mice in the jet-lag**  
357 **experiment.**

358 Wheel-running activity of additional WT and KO mice also used for the analyses presented in  
359 Figure 4B.

360

361

## 362 **Major response to constant light in cone only mice**

363 We challenged the mice for 70 days in constant light (LL) (200 lux) (Figure 5A, Figure 5-  
364 figure supplement 1). Both genotypes showed rhythmic free-run behaviour but 2 successive  
365 steps could be distinguished. A first transient step in which periods substantially increased in  
366 both genotypes to approximately 25.5 h and then a stabilized free-run in which periods  
367 decreased again, especially in the KO mice (Figure 5B). Thus, 6 out of 7 mutants had periods  
368 shorter than 24 h ( $23.17 \pm 0.21$  h,  $p < 0.015$ ) while one mutant had a period of 24.17 h.  
369 Interestingly, in this interval, KO mice also exhibited almost 8-fold enhanced total locomotor  
370 activity ( $p = 0.035$ ) and more than 4-fold increase of the relative rhythmic power ( $p = 0.028$ )  
371 with respect to WT mice (which activity extensively decreased in LL) (Figure 5B, C),  
372 indicating a reduced inhibition by light and a higher robustness of the circadian rhythm in the  
373 mutant mice. One mutant had arrhythmic locomotor activity during the last 2 weeks in LL.  
374 When animals were replaced in LD to verify integrity of light responsiveness and activity,  
375 mice from both genotypes showed onsets of activity aligned with the start of dark ( $p = 1$ )  
376 (Figure 5A, Figure 5-figure supplement 1) and similar mean activity ratios LD2/LD1 ( $p =$   
377 0.375) (Figure 5D).

378



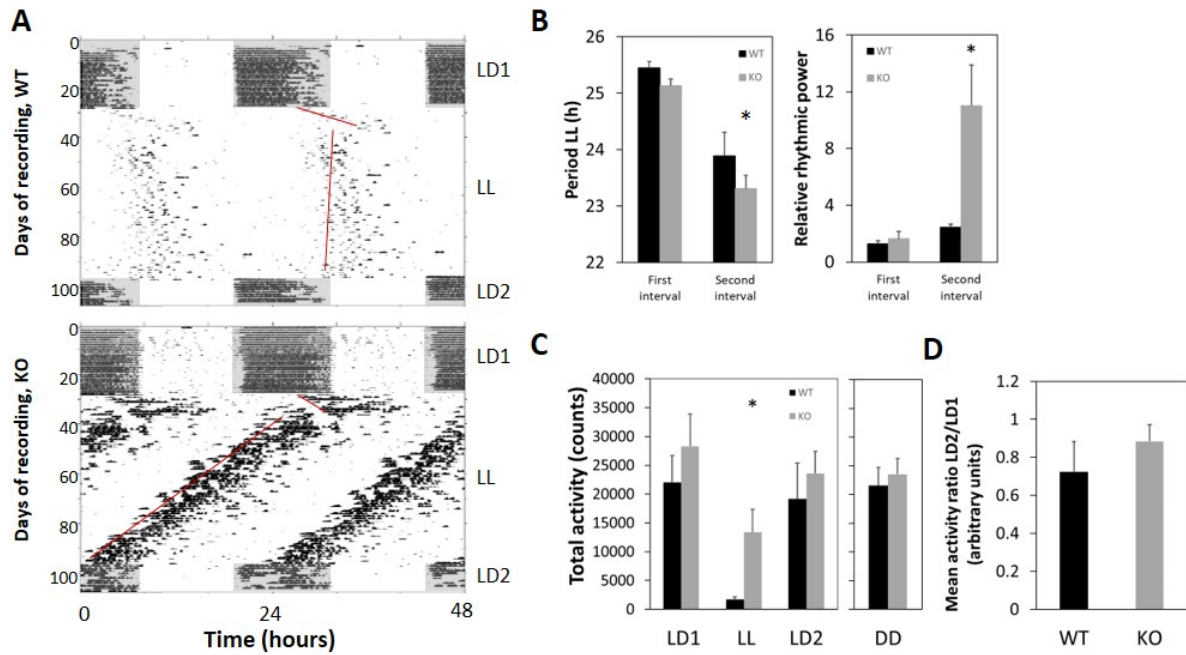

379

380 **Figure 5: Cone-only mice show perturbed behaviour in constant light**

381 (A) Representative actograms from WT (top) and KO (bottom) animals submitted to 70 days  
382 of constant light at 200 lux. Animals were previously maintained in 12h/12h LD cycle (LD1)  
383 and returned to the same lighting regime (LD2) following LL conditions. Grey shading  
384 indicates darkness. Fits to onset of activity used to determine periods are shown in red. (B)  
385 Activity pattern was separated into 2 distinctive intervals of behaviour and thus analysed  
386 separately: a first interval with increasing periods for both genotypes and a second one with  
387 reducing periods in which the mutant mice exhibited extremely low period values (n = 6 out  
388 of 7;  $p = 0.015$ ). Relative rhythmic power was increased in the KO during the second interval  
389 ( $p = 0.028$ ). (C) Total activity per cycle was measured in LL (second interval), LD1, LD2 and  
390 also compared to the DD condition from Figure 2. Significant difference between WT and  
391 mutant mice was observed for total activity specifically during LL ( $p = 0.035$ ). Total activity  
392 did not vary for KO animals between lighting regimens ( $p = 0.066$ ) but did for WT between  
393 LL and the other lighting conditions ( $p = 0.022$ ). (D) No alterations of activity when animals  
394 return to LD, as indicated by similar mean activity ratios LD2/LD1 for WT and KO ( $p =$   
395  $0.375$ ) (WT n = 6, KO n = 7). Results are represented as mean  $\pm$  SEM. \*:  $p < 0.05$ .

396 **Figure 5-Source Data 5: Raw data from experiments shown in figure 5**

397 **Figure 5-figure supplement 1: Additional actograms of WT and KO mice in constant**  
398 **light condition**

## WT

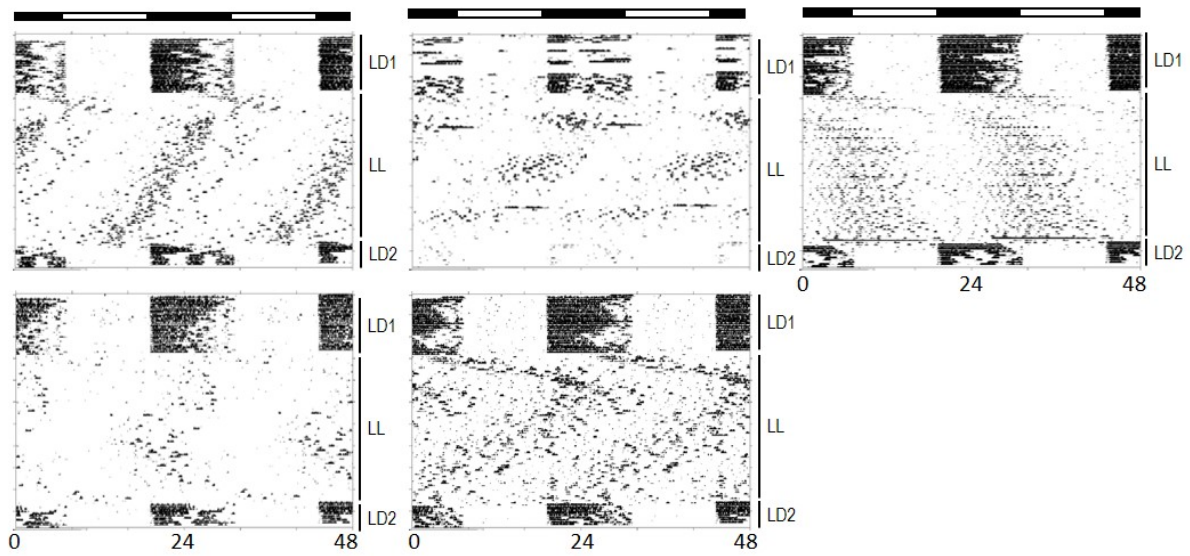

## KO

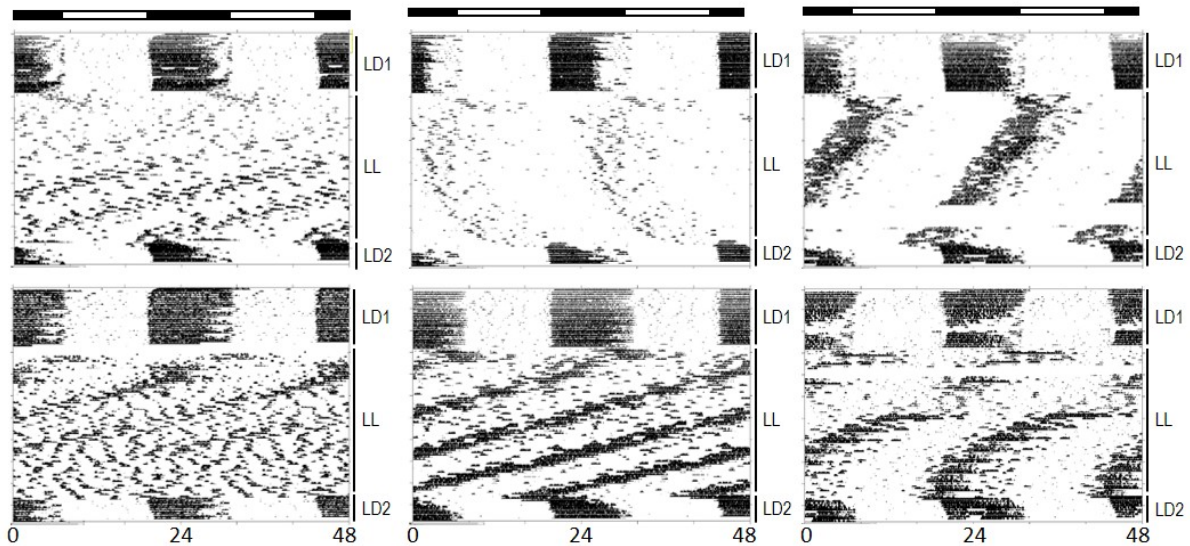

399

400 **Figure 5-figure supplement 1:** Additional actograms of WT and KO mice in constant light  
401 condition

402 Wheel-running activity of additional WT and KO mice also used for the analyses presented in  
403 Figure 5B-D.

404

405

## 406 *Discussion*

407 In the present study we used different approaches to determine the role of cones in the  
408 circadian system. We show that photoreceptor layers lacking functional rods but having  
409 normal cone and cone-pathway contain a molecular machinery characteristic of a functional  
410 clockwork and likely contribute, together with the inner and ganglion cell layers, to the  
411 overall clock rhythmicity in the retina. We bring evidence that the *Nrt<sup>-/-</sup>* retina also displays  
412 novel distinctive properties regarding light impact on the central clock, providing new insight  
413 into the role of cones in the circadian system.

414 Rhythmic functions in mammalian cones have been only poorly documented (Bobu, Sandu,  
415 Laurent, Felder-Schmittbuhl, & Hicks, 2013; Liu et al., 2012; Sakamoto, Liu, Kasamatsu,  
416 Iuvone, & Tosini, 2006; Storch et al., 2007; von Schantz, Lucas, & Foster, 1999), likely  
417 because of the scarcity of this cell type in nocturnal rodents (Jeon et al., 1998; Szel &  
418 Rohlich, 1992). To circumvent this limitation, we used the *Nrt<sup>-/-</sup>* animal model in which all  
419 rods are replaced by cones (Akimoto et al., 2006; Mears et al., 2001). These photoreceptors  
420 were previously shown to have major characteristics of native blue cones regarding  
421 morphology, molecular content, nuclear architecture and light response (Akimoto et al., 2006;  
422 Daniele et al., 2005; Mears et al., 2001; Nikonov et al., 2005) and constitute an adequate  
423 model to question the properties of cones without the interference from rods. Moreover, and  
424 unlike what was shown in other models with impaired rod phototransduction pathway  
425 (Munteanu et al., 2018; Sakamoto, Liu, & Tosini, 2004) these retinas show no sign of  
426 alteration of other cellular populations such as dopaminergic amacrine cells, ipRGCs, which  
427 are known to contribute to clock properties in the retina (Dkhissi-Benyahya et al., 2013; Liu  
428 et al., 2012).

429 Cellular localization of the circadian clock in the mammalian retina is still a matter of debate.  
430 The literature agrees on a main contribution from the inner retina (Jaeger et al., 2015; Ruan et

431 al., 2008) and several reports exclude rod-type photoreceptors from the circadian network  
432 (Baba et al., 2018; Liu et al., 2012; Ruan, Zhang, Zhou, Yamazaki, & McMahon, 2006)  
433 although the presence of sustained clock gene rhythms in rods has been suggested elsewhere  
434 (Dkhissi-Benyahya et al., 2013; Jaeger et al., 2015; Sandu et al., 2011; Tosini, Davidson,  
435 Fukuhara, Kasamatsu, & Castanon-Cervantes, 2007). Upon immunofluorescence analysis of  
436 clock protein factors, cones appeared the most evident cell-autonomous clock in the mouse  
437 retina (Liu et al., 2012). In agreement with this study, we here describe robust rhythms in  
438 expression of clock genes from the main (*Bmal1*, *Per1*, *Per3*) and secondary (*Rev-Erba*)  
439 loops of the well described molecular machinery (Takahashi, 2017) in *Nrl*<sup>-/-</sup> photoreceptor  
440 layers laser-microdissected throughout the 24 h cycle in constant dark condition. However,  
441 unlike what was described for immunostained clock factors, their mRNAs show distinct  
442 phases, as observed at the level of the whole retina (Ruan et al., 2008), which might be due to  
443 the enrichment in S- versus M-cones in the KO retinas or suggest post-transcriptional  
444 regulation of clock factors. We previously described that cones are the photoreceptor site of  
445 robust oscillations in *Aanat* (the enzyme responsible for melatonin rhythm) expression by  
446 using a diurnal, cone-rich rodent, *Arvicanthis ansorgei* (Bobu et al., 2013; Giancesini et al.,  
447 2015). Besides, circadian rhythms in cone-specific genes have essentially been investigated in  
448 chicken (Haque et al., 2010; Pierce et al., 1993) and zebrafish (P. Li et al., 2008). In  
449 particular, robust rhythms in phototransduction genes in zebrafish cones appear driven by key  
450 transcription factors (*Neurod*, *Crx*) themselves regulated by the clock (Laranjeiro &  
451 Whitmore, 2014). In our study, cones express major phototransduction elements in a rhythmic  
452 manner with high amplitudes but we did not detect any rhythm in *Crx* expression, indicating  
453 that in mammalian cones phototransduction elements retain clock regulation but with  
454 mechanisms distinct from the zebrafish. Importantly, when isolated by vibratome-sectioning  
455 of fresh retinas, cone layers express sustained rhythms with a specific period, distinct from the  
456 period measured in photoreceptor layers from control mice. This observation probably reflects

457 the differences in clock machinery and associated signalling occurring in rods (97% of  
458 photoreceptors in WT) versus cones. It might also reflect a difference in coupling strength  
459 within the respective photoreceptor populations, as previously described in the retina (Jaeger  
460 et al., 2015). Communication through gap junctions might be reduced in the S-cone enriched  
461 photoreceptor layers of the KO, since expression of connexin 36 was shown to be absent in  
462 this cone population in mammals (W. Li & DeVries, 2004). This might be responsible for the  
463 increased period in the KO (Jaeger et al., 2015). Taken together with our demonstration of  
464 rhythmic phagocytosis of cone outer segments (Krigel et al., 2010) our data strongly suggest  
465 the presence of a functional, autonomous circadian clock within cones.

466

467 To get more insight into the contribution of cones to the retinal clock network we turned to an  
468 imaging-coupled bioluminescence approach. Bioluminescence imaging of transversal retinal  
469 sections shows rhythmic *Per2* expression throughout the (cone) outer nuclear layer,  
470 confirming that cones contribute to the retinal clock network, even if this is low when  
471 compared to the signal displayed by the ganglion cell and inner nuclear layers. The  
472 observation that the three cell layers of the retina show similar, >25 h periods further fits with  
473 our previously described model of multi-oscillatory retinal clock (Jaeger et al., 2015). By  
474 contrast, when considering bioluminescence in whole retinal explants, the replacement of rods  
475 by cones leads to substantial reduction in baseline and amplitude without any effect on the  
476 period, rhythmic power and damping rate. This result is unexpected in regard of recent  
477 literature reporting the absence of clock in rods (Baba et al., 2018; Ruan et al., 2006) and does  
478 not exclude that the rod population does contain a clock and contributes to the oscillator  
479 network in whole retinas. It cannot be excluded, however, that the defects in the *Nrl*<sup>-/-</sup> retinas  
480 reflect the health status of their photoreceptors, even if sampling was done prior to their  
481 reported apoptosis period (Roger et al., 2012).

482

483 The involvement of cones in circadian functions has been substantially documented. A role in  
484 synchronisation of the SCN has been demonstrated for both green cones (Dkhissi-Benyahya  
485 et al., 2007) and S-cones (Provencio & Foster, 1995; van Diepen et al., 2013; van Oosterhout  
486 et al., 2012; Walmsley et al., 2015). However, the contribution of cones to the effects of white  
487 ambient lighting on circadian properties and more generally non-image forming vision, has  
488 been evaluated with a limited variety of visually impaired mouse models. We used a battery  
489 of behavioural tests (Hughes, Jagannath, Hankins, Foster, & Peirson, 2015) to investigate this  
490 question with the cone-only *Nrl*<sup>-/-</sup> model. Our data were generated in indoor laboratory  
491 conditions comprising full spectrum visual light in agreement with the capacity of the KO  
492 model to respond to photopic light similar to the WT upon electroretinography recording  
493 (Figure 2-figure supplement 1). We observed that the high number of cones does not provide  
494 any increased response capacity of the circadian system to the diverse light stimulation  
495 paradigms used here. This result corroborates previous discussion in the field, suggesting that  
496 the light adaptation properties of cones preclude their participation in the input of long light  
497 exposure to the circadian system, including phase shift experiments (Altimus et al., 2010; Lall  
498 et al., 2010). Indeed, no defect was detected in *Nrl*<sup>-/-</sup> mice under the phase shift paradigm (as  
499 also seen in (Calligaro et al., 2019)). By contrast, our model rather displays some features  
500 typical of rodless animals, such as reduced capacity to shift at low light intensity (1 or 0.1 lux)  
501 in a jet-lag experiment, as previously observed with the *Gnat1*<sup>-/-</sup> model (Altimus et al., 2010).  
502 Physiological features of rodless retina are also reflected in dopamine metabolism (Figure 1-  
503 figure supplement 2D), with the loss of daily rhythm of DOPAC generation in KO retinas  
504 (Nir & Iuvone, 1994; Perez-Fernandez et al., 2019) as previously described for the rds strain.  
505 The discrepancy between the results from light pulse and the jet-lag experiments might be due  
506 to the fact that the threshold levels required for entrainment constitute a more sensitive test of  
507 deficit in entrainment than phase shift following a light pulse (Mrosovsky, 2003).

508

509 Rats or mice with outer retinal impairment were repeatedly reported to exhibit total loss of  
510 positive masking by light and (consequently) enhanced inhibition of locomotor activity  
511 (negative masking), especially at low light intensities (Mrosovsky, Foster, & Salmon, 1999;  
512 Thompson et al., 2010; Thompson et al., 2011). By contrast, melanopsin phototransduction  
513 appears indispensable for negative masking (Mrosovsky & Hattar, 2003). Using  
514 monochromatic light, Thompson et al. also provide evidence that cones (short- and medium-  
515 wavelength sensitive) contribute to negative masking and influence its dynamic range  
516 (Thompson, Foster, Stone, Sheffield, & Mrosovsky, 2008). In the present study, the *Nrl*<sup>-/-</sup>  
517 animals show reduced negative masking behaviour specifically at low light intensities  
518 (between 0.5 and 10 lux), despite a normal ipRGC population and unlike most rodless mice.  
519 The discrepancy between this result and the literature might be explained by the fact that we  
520 used global activity recordings and not wheel running activity. Indeed, positive masking  
521 might be more pronounced when using wheel running activity and hence introduce a  
522 confounding effect (increased negative masking in rodless animals) at low light intensity.  
523 Furthermore, some data also indicate that rods contribute, at least transiently, to negative  
524 masking at light intensities too low to excite ipRGC (Butler & Silver, 2011). Thus, the  
525 behaviour triggered in the *Nrl*<sup>-/-</sup> animals by acute light stimulation probably reflects the  
526 combined absence of rods and integrity of ipRGC.

527

528 Increase of the endogenous period in constant light has also been partly attributed to rod  
529 signalling (Altimus et al., 2010; Lall et al., 2010) and requires the integrity of ipRGC (Goz et  
530 al., 2008). In our experiments we observed that the free running periods in LL were first  
531 increased to a similar extent for both the WT and mutant mice, suggesting that mechanisms  
532 distinct of the rod-pathway are involved. However, periods then decreased, with WT reaching  
533 a mean value around 24 h and the mutants rather lower periods (23.25 h on average). In  
534 addition, KO mice exhibit particularly high (around 8-fold increase with respect to the WT)

535 level of activity, indicating loss of masking by constant light, a feature which is also shared  
536 with mice devoid of ipRGC (Goz et al., 2008). However, upon re-exposure to a standard 12  
537 h:12 h LD cycle after the LL, both WT and KO mice re-entrained very rapidly, suggesting  
538 that there was no major impairment of the circadian photosensitivity. Short free-running  
539 period values have been rarely described in LL, except in *Per2* clock gene mutants of  
540 different backgrounds (Pendergast, Friday, & Yamazaki, 2010; Spoelstra & Daan, 2008;  
541 Steinlechner et al., 2002). The phenotype in the *Nrl*<sup>-/-</sup> mice could be explained by distinct  
542 hypotheses: 1, their high wheel running activity in LL might feedback on the clock and induce  
543 period shortening (Edgar, Martin, & Dement, 1991); 2, cone abundance could trigger another,  
544 yet unknown signalling towards the central clock. Identification of the mechanisms by which  
545 excess of cones alters properties of the circadian system will require further investigation.

546  
547 In conclusion, by using the *Nrl*<sup>-/-</sup> cone-only mouse model we provide compelling evidence  
548 that cones contain a circadian clock part of the retinal oscillating network. Although *Nrl*<sup>-/-</sup>  
549 mice do not exhibit overt dysfunction of circadian behaviour, their exposure to specific  
550 experimental paradigms highlights their particularities, namely properties induced by the  
551 absence of rods or, importantly, specific to the enlarged cone population and revealed by  
552 exposure to constant light. Taken together with results from other studies, our data confirm  
553 the interest of visual system mutants in the understanding of retinal pathways regulating the  
554 central clock.

555



## 556 **Materials and methods**

### 557 **Animals**

558 Mice were handled according to the French Law implementing the European Union Directive  
559 2010/63/EU. All procedures involving the use of mice were approved by the Animal Use and  
560 Care Committee from Strasbourg (CREMEAS). *Nrl*<sup>-/-</sup> (C57Bl/6J background) mice were  
561 obtained from Dr. C. Grimm (Laboratory of Retinal Cell biology, University Hospital Zurich,  
562 Switzerland) with permission from Dr. A. Swaroop (NEI, Bethesda, MD, USA) (Mears et al.,  
563 2001). *mPer2*<sup>Luc</sup> mice (Yoo et al., 2004) (C57Bl/6J background, previously purchased from  
564 The Jackson Laboratory, Bar Harbor, ME, USA) were crossed with *Nrl* mutants to generate  
565 the *Nrl*<sup>-/-</sup> *Per2*<sup>Luc</sup> and *Nrl*<sup>+/+</sup> *Per2*<sup>Luc</sup> animals. According to experiments, WT (*Nrl*<sup>+/+</sup>) and KO  
566 (*Nrl*<sup>-/-</sup>) animals were either homozygous for the *Per2*<sup>Luc</sup> knock-in allele (stated *Per2*<sup>Luc</sup>  
567 background) or did not contain *Per2*<sup>Luc</sup> allele. All the mice were raised in the Chronobiotron  
568 animal facility (UMS 3415, Strasbourg, France) and housed in standard cages in groups of 3  
569 to 4 individuals, under 12h:12h light-dark (LD) cycles [ZT0-light on, ZT12-light off; broad  
570 spectrum (400-650 nm) white light at 300 lux (MASTER PL-L 4 lamp, Philips, France); no  
571 red light at night] with food and water *ad libitum* and in an ambient temperature of 22 ± 1°C.  
572 Experiments were performed on both males and females unless otherwise stated. In most  
573 cases, no a priori estimation of sample size was performed. Our groups were based on  
574 previous or preliminary data and tried to conform to the 3R rule.

### 575 **Laser microdissection**

576 Six week-old *Nrl*<sup>-/-</sup> males (n = 30) reared in LD were exposed to constant dark (dark/dark,  
577 DD; no dim red light). After 36 h in DD mice were euthanized within the following 24 h in  
578 DD in a CO<sub>2</sub> (up to 20%) airtight chamber at the following projected ZT time points: 0, 4, 8,  
579 12, 16, 20 (n = 5, randomly allocated, per time point). Eyes were enucleated, embedded in

580 Tissue-Tek OCT compound (Sakura Finetek USA, Torrance, CA), frozen on dry ice and  
581 stored at  $-80^{\circ}\text{C}$  until use. Animal handling and eye sampling were performed by using night  
582 vision goggles (ATN NVG-7, ATN-Optics, Chorges, France).

583 20  $\mu\text{m}$  thick eyeball sections were cut on cryostat and placed on polyethylene naphthalate  
584 (PEN) Membrane Frame slides (Life Technologies, Grand Island, NY). Three to four slides (4  
585 sections/slide) were prepared from a single eye specimen. Each slide was stored at  $-80^{\circ}\text{C}$  in a  
586 50 mL nuclease-free tube (pre-chilled on dry ice) and used for laser microdissection within a  
587 week.

588 Frozen slides were thawed at room temperature for 30 s. Sections were stained with cresyl  
589 violet (1% cresyl violet acetate in 70% ethanol) for 30 s, then dehydrated through a series of  
590 ethanol solutions: 2 x 75% for 30 s, 95% for 30 s, 100% for 30 s and 100% for 2 min. Slides  
591 were air dried at room temperature for 1 min then completely dehydrated in a vacuum  
592 chamber for 1 h before microdissection. The whole procedure was performed in RNase free  
593 conditions.

594 Laser microdissection was performed using the Veritas Microdissection Arcturus system and  
595 software (Arcturus Bioscience, Inc. Mountain View, CA, USA) immediately after complete  
596 dehydration of the slides. The cone photoreceptor areas of interest were selected under  
597 microscope (20x magnification) and transferred on CapSure Macro LCM Caps (Life  
598 Technologies, Grand Island, NY) by the combined use of the infrared (power 70-80 mW,  
599 pulse 1500-3500  $\mu\text{s}$ ) and UV (low power 2-4) lasers (See also Figure 1A). A total cone  
600 photoreceptor area of 3  $\text{mm}^2$  was collected per eye. In order to prevent RNase reactivation  
601 and RNA degradation, the microdissection was carried out within maximum 60 min for each  
602 slide. 3-4 caps/eye were collected into the same reaction tube which contained RLT<sup>+</sup> lysis  
603 buffer (Qiagen, Hilden, Germany) and stored at  $-80^{\circ}\text{C}$ .

604

## 605 **Quantitative reverse-transcription PCR**

606 Total RNA was extracted from the microdissection lysates using RNeasy Plus Micro kit  
607 (Qiagen, Hilden, Germany) according to the manufacturer's instructions and eluted in a final  
608 volume of 12  $\mu$ L. RNA quantity and purity were measured using the Nanodrop ND-1000  
609 spectrophotometer (Thermo Scientific, Wilmington, DE, USA). RNA integrity was assessed  
610 with the 2100 Bioanalyzer (Agilent Technologies, Santa Clara, CA, USA) and the RNA 6000  
611 Pico chips (Agilent Technologies, Santa Clara, CA, USA), following the manufacturer's  
612 instructions. 25 ng of RNA from samples with the RNA integrity number (RIN) > 6 (n = 3-5)  
613 were amplified using ExpressArt mRNA amplification Nano kit (Amsbio, Oxon, UK). 150 ng  
614 of amplified RNA was reverse transcribed by using the iScript™ Advanced cDNA Synthesis  
615 Kit for RT-qPCR (Bio-Rad, Hercules, CA, USA) in a final volume of 20  $\mu$ L. All samples  
616 were stored at  $-80^{\circ}\text{C}$ .

617 500 ng total RNA extracted from whole retinas of 4-month old mice (n = 7 WT, n = 8 KO;  
618 euthanasia at ZT7-8 by CO<sub>2</sub>) were reverse transcribed using the High capacity RNA-to-cDNA  
619 Kit (Applied Biosystems, ref# 4387406).

620 Transcript levels were determined by quantitative PCR as described (Sandu et al., 2011), with  
621 PCR reactions run in duplicates. The purity of the microdissected samples was verified by the  
622 absence of detection by qPCR, of transcripts for tyrosine hydroxylase (*Th*) gene and  
623 metabotropic glutamate receptor 6 (*mGluR6*) gene, as markers for the inner nuclear layer.  
624 Transcript levels were normalized to the levels of *Tbp* and *Hprt* which showed constant  
625 expression in the isolated cones over the 24 h (data not shown). Transcript levels in whole  
626 retinas were normalized to the levels of *Gapdh* and *Hprt* which did not vary between  
627 genotypes (data not shown). All TaqMan probe-based assays were purchased from Applied  
628 Biosystems (Applied Biosystems, Foster City, CA, USA) and designed to span exon  
629 boundaries (Table 2). Data was quantified using the  $\Delta\text{Cq}$  method, modified to take into

630 account gene-specific amplification efficiencies and multiple reference genes, and the qBase  
631 software (free v1.3.5) (Hellemans, Mortier, De Paepe, Speleman, & Vandesompele, 2007). In  
632 microdissected cones, log transcript levels were calculated relative to the transcript levels  
633 measured in a WT photoreceptor sample which were rescaled to one. We used Excell  
634 software to detect outliers which were removed for the final statistical analysis (n = 1 for  
635 *Per1*, *Per2* and *Per3* quantification).

### 636 **Real-time bioluminescence recordings**

637 Bioluminescence recordings from whole retinas and isolated photoreceptor layers were  
638 obtained in several successive experiments and data were analysed all together. Only samples  
639 generating a bioluminescence signal above the background level were retained in the study.

### 640 **Whole retina explant cultures**

641 WT and KO mice (5-6 week-old, *Per2<sup>Luc</sup>* background), were euthanized with CO<sub>2</sub>  
642 (progressive increase up to 20% in an airtight box) during the light phase and enucleated.  
643 Eyeballs were kept at room temperature in HBSS [1 x HBSS (Sigma-Aldrich, Steinheim,  
644 Germany) containing antibiotics (100 U/mL penicillin and 100 mg/ml streptomycin, Sigma-  
645 Aldrich, Steinheim, Germany), 100 mM HEPES (Sigma-Aldrich, Steinheim, Germany) and  
646 4.2 mM sodium bicarbonate (Sigma-Aldrich, Steinheim, Germany)] for whole retina  
647 dissection. The eye ball was incised under the ora serrata and the cornea and lens were cut  
648 out. Retinas were carefully detached from the retinal pigment epithelium and flattened with  
649 small radial incisions.

650 Each flattened retina was placed, photoreceptors down, onto a semipermeable membrane  
651 (Millipore, Billerica, MA, USA) in a 35 mm culture dish (Nunc, ThermoFisher, France)  
652 containing pre-incubation medium [1 ml neurobasal A medium (Gibco, Invitrogen, Life  
653 Technologies, Carlsbad, CA, USA) supplemented with antibiotics (25 U/ml penicillin and 25

654 mg/mL streptomycin, Sigma-Aldrich), 2% B27 (Invitrogen, Life Technologies, Grand Island,  
655 NY, USA), and 2 mM L-glutamine (Gibco, Life Technologies, Carlsbad, CA, USA). Samples  
656 were kept 24 h at 37°C in a humidified 5% CO<sub>2</sub> incubator then the medium was changed with  
657 pre-warmed (37°C) 199 recording medium [1 mL medium 199 (Sigma-Aldrich, St. Louis,  
658 MO, USA) supplemented with antibiotics (25 U/mL penicillin and 25 mg/mL streptomycin,  
659 Sigma-Aldrich), 4 mM sodium bicarbonate, 20 mM D(+)-glucose (Sigma-Aldrich), 2% B27  
660 (Invitrogen), 0.7 mM L-glutamine (Gibco), and 100 mM beetle luciferin (Promega, Fitchburg,  
661 WI, USA). The medium change was performed under dim red light. Dishes were sealed with  
662 high-vacuum grease (Dow Corning; Midland, MI, USA) and placed into the LumiCycle  
663 (Actimetrix, Wilmette, IL, USA) heated at 36°C. Samples were recorded during 6-8 days and  
664 the photons were integrated for 112 s every 15 min. In bioluminescence recordings, the 2  
665 retinas from the same animal are considered as independent, biological replicates. We here  
666 analysed n = 12 (8 mice) for WT and n = 12 (7 mice) for KO.

667

### 668 **Photoreceptor layer explant cultures**

669 Retinas were dissected as described above. Photoreceptor layers were isolated using the  
670 vibratome technique and cultured as reported previously (Jaeger et al., 2015). WT (n = 6  
671 samples, 6 mice) and KO (n = 9 samples, 8 mice) photoreceptor explants were recorded for at  
672 least 5 days and the photons were integrated for 112 s every 15 min. Exceptionally, when  
673 layers of insufficient size were collected, samples from both retinas were cultured together (2  
674 samples in WT group, 1 sample in KO group).

### 675 **Transversal retinal slice imaging**

676 Flattened retinas (4 week-old KO mice, n = 3, *Per2<sup>Luc</sup>* background) were mounted with warm  
677 (37°C) 5% gelatin on top of a 10% gelatin block. The whole retina-embedded block was

678 glued on the tissue holder and then placed into the tissue bath (containing HBSS, Sigma-  
679 Aldrich) of a Vibroslice MA752 (Campden Instruments, Loughborough, England). A  
680 transversal 100  $\mu\text{m}$  thick slice was cut, placed carefully on a semipermeable membrane in a  
681 35 mm culture dish and pre-incubated with neurobasal A medium for 24 h. Just before  
682 imaging the medium was replaced with pre-warmed recording medium under dim red light.  
683 The sealed dish was placed into the culture chamber (37°C) of a Luminoview 200 microscope  
684 (Olympus, Hamburg, Germany) equipped with an EM-CCD camera (Hamamatsu, Japan)  
685 cooled to  $-76^\circ\text{C}$ . Bioluminescence images (20x objective, EM gain = 80,  $1 \times 1$  binning of  
686 pixels) were taken every 2 h over minimum 3 days.

### 687 **SCN bioluminescence recordings**

688 Animals (9 month-old, WT n = 5, KO n = 7, *Per2<sup>Luc</sup>* background) were killed by cervical  
689 dislocation and brains were rapidly removed and placed in ice-cold HBSS. One 500 $\mu\text{m}$   
690 coronal section of the SCN region was obtained using a stainless steel adult mouse brain slicer  
691 matrix (ZIVIC Instruments, Pittsburgh, USA), then trimmed to  $1 \times 1$  mm. Each SCN explant  
692 (containing both nuclei) was cultured onto a Millicell culture membrane (Merck Millipore  
693 Ltd, Tullagreen, Ireland) in a 35-mm culture dish with 1 mL of DMEM (Sigma-Aldrich)  
694 supplemented with 0.35% D(+)-glucose, 0.035% sodium bicarbonate, 10 mM HEPES, 2%  
695 B27, antibiotics (25U/mL penicillin and 25mg/mL streptomycin) and 0.1 mM beetle luciferin.  
696 Culture dishes were sealed with vacuum grease. The bioluminescence was recorded using the  
697 LumiCycle for 112 s in 15 min intervals and during at least 6 days.

### 698 **Bioluminescence data analysis**

699 Whole retina and SCN explant PER2::LUC raw data were subtracted with a 24 h running  
700 average (removal of the baseline drift) using the LumiCycle analysis software (Actimetrics,  
701 Wilmette, IL, USA). The first cycle was removed and the analysis was performed on the

702 following 4 (retina) or 5 (SCN) cycles. The robustness of the rhythms (relative rhythmic  
703 power (Klarsfeld, Leloup, & Rouyer, 2003)) and the phase were also calculated using the  
704 LumiCycle analysis software. The period, amplitude and damping rate were determined using  
705 a cosinor derived sine wave function:  $f = y_0 + a * \exp(-x/d) * \sin [2 * \pi * (x + c) / b]$  where a  
706 is the amplitude (counts/s), b is the period (h), c is the phase-related term (h) and d is the  
707 damping rate (days) and assuming that damping follows an exponential pattern. Baseline for  
708 each individual peak in retinal samples was estimated as the baseline from LumiCycle  
709 analysis taken at the peak time.

710 Photoreceptor layer data were analyzed as previously described, on 4 successive cycles  
711 (Jaeger et al., 2015).

712 Bioluminescence data from whole retinas and photoreceptor layers were obtained over several  
713 series of recordings: samples for which activity did not exceed the background of Lumicycle  
714 were excluded from the study

715

716 Transversal retinal images were analyzed with ImageJ (open source software  
717 <https://imagej.nih.gov/>). A median 3D filter was applied to remove the hotspots. The ganglion  
718 cell layer (GCL), inner nuclear layer (INL) and photoreceptor layer (PRL) were defined as  
719 regions of interest (ROI) and the bioluminescence levels (grey levels) were measured and  
720 exported for the analysis of rhythmicity. The periods were determined using the cosinor  
721 derived sine wave function:  $f = y_0 + a * \exp(-x/d) * \sin [2 * \pi * (x + c) / b]$  as above.

722

### 723 **Retina whole-mount immunohistochemistry**

724 Immunohistochemical staining was performed on whole retinas obtained from 6-8 week-old  
725 *Nrl<sup>-/-</sup> Per2<sup>Luc</sup>* mice (WT n = 5, KO n = 6). Eyes were sampled by enucleation from mice  
726 euthanized between ZT3 and ZT6 by cervical dislocation and immediately fixed in 4%

727 paraformaldehyde for 2 h at room temperature (RT). Retinas were dissected and flattened by  
728 four incomplete radial incisions made at roughly equal spacing. Free floating retinas were  
729 blocked in 10% normal donkey serum (NDS), 1% Bovine Serum Albumin (BSA), 0.5%  
730 Triton X-Phosphate Buffered Saline (Tx-PBS) for 3 h at RT and subsequently incubated 5  
731 days under gentle agitation in 3% NDS, 1% BSA, 0.5% Tx-PBS and 0.05% Sodium azide at  
732 4°C with primary antibodies: polyclonal anti-melanopsin (OPN4) antibody (clone AF006,  
733 Advanced Targeting System; 1:4000), as previously published in (Provencio, Rollag, &  
734 Castrucci, 2002) and polyclonal anti-Tyrosine Hydroxylase (TH) (reference AB1542  
735 Millipore; 1:4000). Retinas were washed extensively in PBS (6 x 30 min at RT), and  
736 incubated with Alexa secondary antibodies (Invitrogen; 1:1000) 3 h at RT. After washing the  
737 secondary antibodies (6 x 30 min at RT), retinas were mounted with Fluoromount-G  
738 (Southern Biotech) to prevent photobleaching. Retinal whole-mount fluorescent images were  
739 obtained using an Axio Imager 2 microscope for mosaic imaging (Zeiss; 10x objective) at  
740 identical exposure times between WT and KO specimens. Quantification was performed by  
741 counting the total numbers of OPN4 and TH positive cells on the photographs using the  
742 Adobe Photoshop CS6 software (no image treatment was done).

743

#### 744 **HPLC measurements**

745 4 months-old mice (n = 6 per genotype group and per time point, randomly allocated) were  
746 euthanized by CO<sub>2</sub> (20%) at ZT4 and ZT16 and retinas were rapidly extracted after slitting  
747 the cornea with a sterile scalpel blade and discarding the lens and vitreous. Retinas were  
748 quickly frozen on dry ice and stored at -80°C. Frozen retinas were homogenized by  
749 ultrasonication in 0.4M HClO<sub>4</sub>. Samples were centrifuged (13 000 rpm) for 20 minutes, and  
750 supernatants were analyzed for dopamine and 3,4-dihydroxyphenylacetic acid (DOPAC) with  
751 an HPLC system (Decade II Antec). Standard solution of dopamine and DOPAC (Sigma-



752 Aldrich) were diluted in the same mobile phase in order to obtain a 3-point standard curve for  
753 each standard for the quantification of the samples.

754

## 755 **Electroretinography**

756 Electroretinography was used to assess visual sensitivity of *Nrl*<sup>-/-</sup> mice in the visible spectrum  
757 using the RETI port / scan 21 setup (Stasche & Finger GmbH, Roland Consult, Brandenburg,  
758 Germany) as previously reported (Ait-Hmyed Hakkari et al., 2016). All recordings were  
759 obtained around the middle of the animal's light phase between projected ZT5 and ZT7. Dark-  
760 adapted mice (n=5 for WT, n=3 for KO) were anesthetized by subcutaneous injection of  
761 ketamine (50 mg/kg; Imalgène 1000; Merial, Lyon, France) and xylazine (10 mg/kg; Rompun  
762 2%; Bayer, Puteau, France). Pupils were dilated with 0.5% Tropicamide (Ciba Vision  
763 Ophthalmics, Blagnac, France). Animals were then placed on a warming plate to maintain a  
764 constant body temperature, and ground, reference, and corneal electrodes (thin gold wire with  
765 a 2-mm ring end) were placed accordingly. Eyes were kept moist with eye drops (Ocry-Gel;  
766 TVM Lab, Lempdes, France). Mice were then exposed to a rod-saturating white light  
767 background (40 cd/m<sup>2</sup>) inside the Gansfeld bowl. After 10 min of light-adaptation, single-  
768 flash photopic ERG recordings were performed successively at specific wavelengths 455 and  
769 525 nm and then under white light, at 1, 3 and 10 cd.s/m<sup>2</sup> (6 flashes per intensity). Amplitudes  
770 of a and b-waves were analyzed off-line: only the b-wave was measurable for photopic ERG.

771

## 772 **Locomotor activity recordings**

773 For behavioural recordings, male and female mice (WT and KO combined or not with the  
774 *Per2*<sup>Luc</sup> knock-in allele) were housed in individual standard cages equipped with a 10-cm-  
775 diameter stainless steel running wheel (Mendoza, Graff, Dardente, Pevet, & Challet, 2005) or  
776 with infrared detectors placed above the cage and linked to an automated recording system

777 (CAMS, Circadian Activity Monitoring System, Lyon, France) as previously described  
778 (Salaberry, Hamm, Felder-Schmittbuhl, & Mendoza, 2019). Data were collected in 5 min bins  
779 and analysed with the ClockLab Software (Actimetrics, Wilmette, IL, USA). Locomotor  
780 activity data were double-plotted in actograms.

## 781 **Circadian phenotype**

782 To determine the daily and circadian rhythm of locomotor activity in *Nrl* mutant mice, 5-6  
783 month-old mice (WT n = 4, KO n = 7, *Per2<sup>Luc</sup>* background) were initially maintained for 12  
784 days under LD 12:12 and then 19 days under constant darkness (DD). Total activity and *rho*-  
785 and *alpha*-phase activity levels were calculated during LD and the endogenous period (Chi-  
786 square Periodogram method) was determined over 10-day interval after 7 days from the  
787 transition to DD.

## 788 **Behavioural phase-shifts to light pulses**

789 To evaluate phase shifting in response to light pulses 5-6 week-old mice (WT n = 5, KO n =  
790 8) were initially maintained in LD 12:12 (100 lux) and then challenged by 3 alternating DD  
791 (9-14 days) - LD (14-18 days) cycles. On the day before each light-pulse, the room lights  
792 went off at ZT12. On the following day a 15 min light pulse (LP) was applied at the projected  
793 ZT15. Then lights remained off for at least 9 days before re-exposing animals to LD  
794 condition. The intensity of the light pulses decreased one order of magnitude as indicated in  
795 Figure 3A, B. To determine phase changes in control and *Nrl* mutant mice, a linear regression  
796 analysis of the activity onsets was performed by projecting the onset phase of the free run in  
797 DD back to the mean onset phase under LD condition (ClockLab).

## 798 **Masking**

799 To evaluate the negative masking response to light, 3-6 month-old mice (WT n = 6, KO n = 7,  
800 *Per2<sup>Luc</sup>* background) mice adapted to 12:12 LD cycle were housed in individual cages into a

801 ventilated cabinet (Charles River Laboratories, France) equipped with broad spectrum white  
802 light lamp (MASTER TL-D Super 80 lamp, Philips). The masking effect of light was tested  
803 by exposing the animals to light for 3 hours from ZT14 to ZT17 at successive light intensities  
804 as follows: day 1 (baseline) - standard 12:12 LD; day 2 – ZT14-17 at <1 lux; day 4 – ZT14-17  
805 at 1-10 lux; day 6 – ZT14-17 at 10-50 lux; day 8 – ZT14-17 at 200-400 lux; days 3, 5, 7 –  
806 standard 12:12 LD. Locomotor activity was monitored with infrared cage top motion sensors  
807 connected to the CAMS data acquisition system (Circadian Activity Monitoring system,  
808 INSERM, Lyon, France) (Dkhissi-Benyahya et al., 2007). The percent of activity during the 3  
809 h light pulse was calculated relative to the 12 h activity of the preceding standard night.

### 810 **Re-entrainment to 6-h light–dark cycle delay**

811 1.5-3 month-old mice (WT n = 5, KO n = 5) were kept for 23 days in LD at 100 lux (LD1)  
812 and then challenged with 4 successive 6-h phase delays, mimicking a jet-lag (JL) or cycle  
813 change across six time zones, combined with reduction of light intensity: JL1 (21 days, 100  
814 lux), JL2 (22 days, 10 lux), JL3 (51 days, 1 lux) JL4 (50 days, 0,1 lux). At the end of the last  
815 JL exposure, animals were transferred to DD (22 days) and then re-exposed 25 days to LD at  
816 100 lux (LD2). The phase angle of entrainment was determined by calculating the difference  
817 between the time of lights off and the time of activity onset (ClockLab).

### 818 **Exposure to constant light**

819 We tested the effects of constant light exposure (light/light, LL) on cone-only animals by  
820 assessing wheel running activity in 6 month-old mice (WT n = 6, KO n = 7, *Per2<sup>Luc</sup>*  
821 background). Thus, after 10 days in LD 12:12 animals were transferred to LL for 70 days at  
822 200 lux. Total activity per cycle, period and relative rhythmic power were measured by using  
823 ClockLab. Mice were then exposed to a second LD cycle (LD2: 10 days) to evaluate if  
824 entrainment and locomotor activity returned to baseline levels.

825 **Statistical analysis**

826 Results are expressed as means  $\pm$  SEM, except for qPCR data. Statistical analyses were  
827 performed by using SigmaPlot 12 software (Systat Software, San Jose, CA, USA).  
828 Comparison of two groups was performed by using the Student's t test. Comparison of several  
829 groups was performed by using 1-way or 2-way ANOVA for independent and repeated  
830 measures, followed by post hoc test (Holm-Sidak test).

831 Data from qRT-PCR over 24 h in DD were also analyzed by nonlinear least-square fitting of a  
832 24 h sinusoid (cosinor analysis)  $f = a + [b \cdot \cos(2 \cdot \pi \cdot (x - c) / 24)]$  (Nelson, Tong, Lee, &  
833 Halberg, 1979). A posteriori Power analysis was also performed and is presented in Figure 1-  
834 figure supplement 1.

835 A statistically significant difference was assumed with  $p$  values less than 0.05.

836  
837

838

| Gene            | TaqMan assay reference | RefSeq         | Exon boundary | Assay location | Amplicon length (bp) |
|-----------------|------------------------|----------------|---------------|----------------|----------------------|
| <i>Bmal1</i>    | Mm00500226_m1          | NM_001243048.1 | 8-9           | 900            | 87                   |
| <i>Clock</i>    | Mm00455950_m1          | NM_001289826.1 | 15-16         | 1548           | 81                   |
| <i>Per1</i>     | Mm00501813_m1          | NM_001159367.1 | 18-19         | 2628           | 106                  |
| <i>Per2</i>     | Mm00478113_m1          | NM_011066.3    | 19-20         | 3271           | 73                   |
| <i>Per3</i>     | Mm00478120_m1          | NM_001289877.1 | 4-5           | 1027           | 73                   |
| <i>Cry1</i>     | Mm00514392_m1          | NM_007771.3    | 1-2           | 740            | 64                   |
| <i>Cry2</i>     | Mm00546062_m1          | NM_009963.4    | 1-2           | 255            | 70                   |
| <i>Rev-Erba</i> | Mm00520708_m1          | NM_145434.4    | 1-2           | 664            | 62                   |
| <i>Rorb</i>     | Mm00524993_m1          | NM_001043354.2 | 2-3           | 730            | 74                   |
| <i>Opn1sw</i>   | Mm00432058_m1          | NM_007538.3    | 4-5           | 1017           | 64                   |
| <i>Opn1mw</i>   | Mm00433560_m1          | NM_008106.2    | 4-5           | 771            | 87                   |
| <i>Opn4</i>     | Mm00443523_m1          | NM_001128599.1 | 1-2           | 327            | 88                   |
| <i>Crx</i>      | Mm00483994_m1          | NM_007770.4    | 1-2           | 141            | 74                   |
| <i>c-Fos</i>    | Mm00487425_m1          | NM_010234.2    | 1-2           | 279            | 59                   |
| <i>Tbp</i>      | Mm00446971_m1          | NM_013684.3    | 2-3           | 305            | 93                   |
| <i>Hprt</i>     | Mm01545399_m1          | NM_013556.2    | 2-3           | 276            | 81                   |
| <i>Gapdh</i>    | Mm99999915_g1          | NM_001289726.1 | 2.3           | 276            | 81                   |
| <i>MGluR6</i>   | Mm00841148_m1          | NM_173372.2    | 9-10          | 2273           | 67                   |
| <i>Th</i>       | Mm00447557_m1          | NM_009377.1    | 12-13         | 1340           | 61                   |

839

840 **Table 2: References of the TaqMan probes (Applied Biosystems, Life**  
 841 **Technologies) used for real-time PCR.**

## Acknowledgements

We thank Dr. Dominique Sage, Dr. Sophie Reibel and Nicolas Lethenet from Chronobiotron UMS 3415 (Strasbourg, France) for animal care, Dr. Anand Swaroop for the *Nrl* KO mice and Daniel Clesse for HPLC measurements.

## References

- Ait-Hmyed Hakkari, O., Acar, N., Savier, E., Spinnhirny, P., Bennis, M., Felder-Schmittbuhl, M. P., . . . Hicks, D. (2016). Rev-Erbalpha modulates retinal visual processing and behavioral responses to light. *FASEB J*, *30*(11), 3690-3701. doi:10.1096/fj.201600414R
- Akimoto, M., Cheng, H., Zhu, D., Brzezinski, J. A., Khanna, R., Filippova, E., . . . Swaroop, A. (2006). Targeting of GFP to newborn rods by *Nrl* promoter and temporal expression profiling of flow-sorted photoreceptors. *Proc Natl Acad Sci U S A*, *103*(10), 3890-3895. doi:10.1073/pnas.0508214103
- Altimus, C. M., Guler, A. D., Alam, N. M., Arman, A. C., Prusky, G. T., Sampath, A. P., & Hattar, S. (2010). Rod photoreceptors drive circadian photoentrainment across a wide range of light intensities. *Nat Neurosci*, *13*(9), 1107-1112. doi:10.1038/nn.2617
- Applebury, M. L., Antoch, M. P., Baxter, L. C., Chun, L. L., Falk, J. D., Farhangfar, F., . . . Robbins, J. T. (2000). The murine cone photoreceptor: a single cone type expresses both S and M opsins with retinal spatial patterning. *Neuron*, *27*(3), 513-523. doi:10.1016/s0896-6273(00)00062-3
- Baba, K., Piano, I., Lyuboslavsky, P., Chrenek, M. A., Sellers, J. T., Zhang, S., . . . Iuvone, P. M. (2018). Removal of clock gene *Bmal1* from the retina affects retinal development and accelerates cone photoreceptor degeneration during aging. *Proc Natl Acad Sci U S A*, *115*(51), 13099-13104. doi:10.1073/pnas.1808137115
- Bobu, C., Sandu, C., Laurent, V., Felder-Schmittbuhl, M. P., & Hicks, D. (2013). Prolonged light exposure induces widespread phase shifting in the circadian clock and visual pigment gene expression of the *Arvicanthis ansorgei* retina. *Mol Vis*, *19*, 1060-1073.
- Boudard, D. L., Mendoza, J., & Hicks, D. (2009). Loss of photic entrainment at low illuminances in rats with acute photoreceptor degeneration. *Eur J Neurosci*, *30*(8), 1527-1536. doi:EJN6935 [pii] 10.1111/j.1460-9568.2009.06935.x
- Butler, M. P., & Silver, R. (2011). Divergent photic thresholds in the non-image-forming visual system: entrainment, masking and pupillary light reflex. *Proc Biol Sci*, *278*(1706), 745-750. doi:10.1098/rspb.2010.1509
- Calligaro, H., Coutanson, C., Najjar, R. P., Mazzaro, N., Cooper, H. M., Haddjeri, N., . . . Dkhissi-Benyahya, O. (2019). Rods contribute to the light-induced phase shift of the retinal clock in mammals. *PLoS Biol*, *17*(3), e2006211. doi:10.1371/journal.pbio.2006211
- Daniele, L. L., Lillo, C., Lyubarsky, A. L., Nikonov, S. S., Philp, N., Mears, A. J., . . . Pugh, E. N., Jr. (2005). Cone-like morphological, molecular, and electrophysiological features of the photoreceptors of the *Nrl* knockout mouse. *Invest Ophthalmol Vis Sci*, *46*(6), 2156-2167. doi:10.1167/iovs.04-1427

- Dkhissi-Benyahya, O., Coutanson, C., Knoblauch, K., Lahouaoui, H., Leviel, V., Rey, C., . . . Cooper, H. M. (2013). The absence of melanopsin alters retinal clock function and dopamine regulation by light. *Cell Mol Life Sci*, 70(18), 3435-3447. doi:10.1007/s00018-013-1338-9
- Dkhissi-Benyahya, O., Gronfier, C., De Vanssay, W., Flamant, F., & Cooper, H. M. (2007). Modeling the role of mid-wavelength cones in circadian responses to light. *Neuron*, 53(5), 677-687. doi:S0896-6273(07)00104-3 [pii] 10.1016/j.neuron.2007.02.005
- Edgar, D. M., Martin, C. E., & Dement, W. C. (1991). Activity feedback to the mammalian circadian pacemaker: influence on observed measures of rhythm period length. *J Biol Rhythms*, 6(3), 185-199. doi:10.1177/074873049100600301
- Felder-Schmittbuhl, M. P., Buhr, E. D., Dkhissi-Benyahya, O., Hicks, D., Peirson, S. N., Ribelayga, C. P., . . . Tosini, G. (2018). Ocular Clocks: Adapting Mechanisms for Eye Functions and Health. *Invest Ophthalmol Vis Sci*, 59(12), 4856-4870. doi:10.1167/iovs.18-24957
- Felder-Schmittbuhl, M. P., Calligaro, H., & Dkhissi-Benyahya, O. (2017). The retinal clock in mammals: role in health and disease. *Chronophysiology Ther.*, 7, 33-45. doi:doi:10.2147/CPT.S115251
- Gianesini, C., Clesse, D., Tosini, G., Hicks, D., & Laurent, V. (2015). Unique Regulation of the Melatonin Synthetic Pathway in the Retina of Diurnal Female *Arvicanthis ansorgei* (Rodentia). *Endocrinology*, 156(9), 3292-3308. doi:10.1210/EN.2015-1267
- Goz, D., Studholme, K., Lappi, D. A., Rollag, M. D., Provencio, I., & Morin, L. P. (2008). Targeted destruction of photosensitive retinal ganglion cells with a saporin conjugate alters the effects of light on mouse circadian rhythms. *PLoS One*, 3(9), e3153. doi:10.1371/journal.pone.0003153
- Guler, A. D., Ecker, J. L., Lall, G. S., Haq, S., Altimus, C. M., Liao, H. W., . . . Hattar, S. (2008). Melanopsin cells are the principal conduits for rod-cone input to non-image-forming vision. *Nature*, 453(7191), 102-105. doi:10.1038/nature06829
- Haque, R., Ali, F. G., Biscoglia, R., Abey, J., Weller, J., Klein, D., & Iuvone, P. M. (2010). CLOCK and NPAS2 have overlapping roles in the circadian oscillation of arylalkylamine N-acetyltransferase mRNA in chicken cone photoreceptors. *J Neurochem*, 113(5), 1296-1306. doi:10.1111/j.1471-4159.2010.06698.x
- Hastings, M. H., Maywood, E. S., & Brancaccio, M. (2019). The Mammalian Circadian Timing System and the Suprachiasmatic Nucleus as Its Pacemaker. *Biology (Basel)*, 8(1). doi:10.3390/biology8010013
- Hatori, M., Le, H., Vollmers, C., Keding, S. R., Tanaka, N., Buch, T., . . . Panda, S. (2008). Inducible ablation of melanopsin-expressing retinal ganglion cells reveals their central role in non-image forming visual responses. *PLoS One*, 3(6), e2451. doi:10.1371/journal.pone.0002451
- Hellemans, J., Mortier, G., De Paepe, A., Speleman, F., & Vandesompele, J. (2007). qBase relative quantification framework and software for management and automated analysis of real-time quantitative PCR data. *Genome Biol*, 8(2), R19. doi:10.1186/gb-2007-8-2-r19
- Hughes, S., Jagannath, A., Hankins, M. W., Foster, R. G., & Peirson, S. N. (2015). Photic regulation of clock systems. *Methods Enzymol*, 552, 125-143. doi:10.1016/bs.mie.2014.10.018
- Hughes, S., Watson, T. S., Foster, R. G., Peirson, S. N., & Hankins, M. W. (2013). Nonuniform distribution and spectral tuning of photosensitive retinal ganglion cells of the mouse retina. *Curr Biol*, 23(17), 1696-1701. doi:10.1016/j.cub.2013.07.010

- Jaeger, C., Sandu, C., Malan, A., Mellac, K., Hicks, D., & Felder-Schmittbuhl, M. P. (2015). Circadian organization of the rodent retina involves strongly coupled, layer-specific oscillators. *FASEB J*, 29(4), 1493-1504. doi:10.1096/fj.14-261214
- Jeon, C. J., Strettoi, E., & Masland, R. H. (1998). The major cell populations of the mouse retina. *J Neurosci*, 18(21), 8936-8946.
- King, D. P., & Takahashi, J. S. (2000). Molecular genetics of circadian rhythms in mammals. *Annu Rev Neurosci*, 23, 713-742. doi:10.1146/annurev.neuro.23.1.713
- Klarsfeld, A., Leloup, J. C., & Rouyer, F. (2003). Circadian rhythms of locomotor activity in *Drosophila*. *Behav Processes*, 64(2), 161-175. doi:10.1016/s0376-6357(03)00133-5
- Krigel, A., Felder-Schmittbuhl, M. P., & Hicks, D. (2010). Circadian-clock driven cone-like photoreceptor phagocytosis in the neural retina leucine zipper gene knockout mouse. *Mol Vis*, 16, 2873-2881. doi:308 [pii]
- Lall, G. S., Revell, V. L., Momiji, H., Al Enezi, J., Altimus, C. M., Guler, A. D., . . . Lucas, R. J. (2010). Distinct contributions of rod, cone, and melanopsin photoreceptors to encoding irradiance. *Neuron*, 66(3), 417-428. doi:10.1016/j.neuron.2010.04.037
- Laranjeiro, R., & Whitmore, D. (2014). Transcription factors involved in retinogenesis are co-opted by the circadian clock following photoreceptor differentiation. *Development*, 141(13), 2644-2656. doi:10.1242/dev.104380
- Li, P., Chaurasia, S. S., Gao, Y., Carr, A. L., Iuvone, P. M., & Li, L. (2008). CLOCK is required for maintaining the circadian rhythms of Opsin mRNA expression in photoreceptor cells. *J Biol Chem*, 283(46), 31673-31678. doi:10.1074/jbc.M803875200
- Li, W., & DeVries, S. H. (2004). Separate blue and green cone networks in the mammalian retina. *Nat Neurosci*, 7(7), 751-756. doi:10.1038/nn1275
- Liu, X., Zhang, Z., & Ribelayga, C. P. (2012). Heterogeneous expression of the core circadian clock proteins among neuronal cell types in mouse retina. *PLoS One*, 7(11), e50602. doi:10.1371/journal.pone.0050602
- McMahon, D. G., Iuvone, P. M., & Tosini, G. (2014). Circadian organization of the mammalian retina: from gene regulation to physiology and diseases. *Prog Retin Eye Res*, 39, 58-76. doi:10.1016/j.preteyeres.2013.12.001
- Mears, A. J., Kondo, M., Swain, P. K., Takada, Y., Bush, R. A., Saunders, T. L., . . . Swaroop, A. (2001). Nrl is required for rod photoreceptor development. *Nat Genet*, 29(4), 447-452. doi:10.1038/ng774
- Mendoza, J., Graff, C., Dardente, H., Pevet, P., & Challet, E. (2005). Feeding cues alter clock gene oscillations and photic responses in the suprachiasmatic nuclei of mice exposed to a light/dark cycle. *J Neurosci*, 25(6), 1514-1522. doi:10.1523/JNEUROSCI.4397-04.2005
- Mouland, J. W., Martial, F., Watson, A., Lucas, R. J., & Brown, T. M. (2019). Cones Support Alignment to an Inconsistent World by Suppressing Mouse Circadian Responses to the Blue Colors Associated with Twilight. *Curr Biol*, 29(24), 4260-4267 e4264. doi:10.1016/j.cub.2019.10.028
- Mrosovsky, N. (2003). Contribution of classic photoreceptors to entrainment. *J Comp Physiol A Neuroethol Sens Neural Behav Physiol*, 189(1), 69-73. doi:10.1007/s00359-002-0378-7
- Mrosovsky, N., Foster, R. G., & Salmon, P. A. (1999). Thresholds for masking responses to light in three strains of retinally degenerate mice. *J Comp Physiol A*, 184(4), 423-428. doi:10.1007/s003590050341
- Mrosovsky, N., & Hattar, S. (2003). Impaired masking responses to light in melanopsin-knockout mice. *Chronobiol Int*, 20(6), 989-999. doi:10.1081/cbi-120026043



- Munteanu, T., Noronha, K. J., Leung, A. C., Pan, S., Lucas, J. A., & Schmidt, T. M. (2018). Light-dependent pathways for dopaminergic amacrine cell development and function. *Elife*, 7. doi:10.7554/eLife.39866
- Nelson, W., Tong, Y. L., Lee, J. K., & Halberg, F. (1979). Methods for cosinor-rhythmometry. *Chronobiologia*, 6(4), 305-323.
- Niki, T., Hamada, T., Ohtomi, M., Sakamoto, K., Suzuki, S., Kako, K., . . . Ishida, N. (1998). The localization of the site of arylalkylamine N-acetyltransferase circadian expression in the photoreceptor cells of mammalian retina. *Biochem Biophys Res Commun*, 248(1), 115-120. doi:10.1006/bbrc.1998.8916
- Nikonov, S. S., Daniele, L. L., Zhu, X., Craft, C. M., Swaroop, A., & Pugh, E. N., Jr. (2005). Photoreceptors of *Nrl* *-/-* mice coexpress functional S- and M-cone opsins having distinct inactivation mechanisms. *J Gen Physiol*, 125(3), 287-304. doi:10.1085/jgp.200409208
- Nir, I., & Iuvone, P. M. (1994). Alterations in light-evoked dopamine metabolism in dystrophic retinas of mutant *rds* mice. *Brain Res*, 649(1-2), 85-94. doi:10.1016/0006-8993(94)91051-0
- Noguchi, T., Michihata, T., Nakamura, W., Takumi, T., Shimizu, R., Yamamoto, M., . . . Nakajima, Y. (2010). Dual-color luciferase mouse directly demonstrates coupled expression of two clock genes. *Biochemistry*, 49(37), 8053-8061. doi:10.1021/bi100545h
- Oishi, K., Sakamoto, K., Okada, T., Nagase, T., & Ishida, N. (1998). Antiphase circadian expression between BMAL1 and period homologue mRNA in the suprachiasmatic nucleus and peripheral tissues of rats. *Biochem Biophys Res Commun*, 253(2), 199-203. doi:10.1006/bbrc.1998.9779
- Pendergast, J. S., Friday, R. C., & Yamazaki, S. (2010). Photic entrainment of period mutant mice is predicted from their phase response curves. *J Neurosci*, 30(36), 12179-12184. doi:10.1523/JNEUROSCI.2607-10.2010
- Perez-Fernandez, V., Milosavljevic, N., Allen, A. E., Vessey, K. A., Jobling, A. I., Fletcher, E. L., . . . Cameron, M. A. (2019). Rod Photoreceptor Activation Alone Defines the Release of Dopamine in the Retina. *Curr Biol*, 29(5), 763-774 e765. doi:10.1016/j.cub.2019.01.042
- Pierce, M. E., Sheshberadaran, H., Zhang, Z., Fox, L. E., Applebury, M. L., & Takahashi, J. S. (1993). Circadian regulation of iodopsin gene expression in embryonic photoreceptors in retinal cell culture. *Neuron*, 10(4), 579-584. doi:10.1016/0896-6273(93)90161-j
- Provencio, I., & Foster, R. G. (1995). Circadian rhythms in mice can be regulated by photoreceptors with cone-like characteristics. *Brain Res*, 694(1-2), 183-190. doi:10.1016/0006-8993(95)00694-1
- Provencio, I., Rollag, M. D., & Castrucci, A. M. (2002). Photoreceptive net in the mammalian retina. This mesh of cells may explain how some blind mice can still tell day from night. *Nature*, 415(6871), 493. doi:10.1038/415493a
- Roger, J. E., Ranganath, K., Zhao, L., Cojocaru, R. I., Brooks, M., Gotoh, N., . . . Swaroop, A. (2012). Preservation of cone photoreceptors after a rapid yet transient degeneration and remodeling in cone-only *Nrl**-/-* mouse retina. *J Neurosci*, 32(2), 528-541. doi:10.1523/JNEUROSCI.3591-11.2012
- Ruan, G. X., Allen, G. C., Yamazaki, S., & McMahan, D. G. (2008). An autonomous circadian clock in the inner mouse retina regulated by dopamine and GABA. *PLoS Biol*, 6(10), e249. doi:10.1371/journal.pbio.0060249

- Ruan, G. X., Zhang, D. Q., Zhou, T., Yamazaki, S., & McMahon, D. G. (2006). Circadian organization of the mammalian retina. *Proc Natl Acad Sci U S A*, *103*(25), 9703-9708. doi:10.1073/pnas.0601940103
- Sakamoto, K., Liu, C., Kasamatsu, M., Iuvone, P. M., & Tosini, G. (2006). Intraocular injection of kainic acid does not abolish the circadian rhythm of arylalkylamine N-acetyltransferase mRNA in rat photoreceptors. *Mol Vis*, *12*, 117-124.
- Sakamoto, K., Liu, C., & Tosini, G. (2004). Classical photoreceptors regulate melanopsin mRNA levels in the rat retina. *J Neurosci*, *24*(43), 9693-9697. doi:24/43/9693 [pii] 10.1523/JNEUROSCI.2556-04.2004
- Salaberry, N. L., Hamm, H., Felder-Schmittbuhl, M. P., & Mendoza, J. (2019). A suprachiasmatic-independent circadian clock(s) in the habenula is affected by Per gene mutations and housing light conditions in mice. *Brain Struct Funct*, *224*(1), 19-31. doi:10.1007/s00429-018-1756-4
- Sandu, C., Hicks, D., & Felder-Schmittbuhl, M. P. (2011). Rat photoreceptor circadian oscillator strongly relies on lighting conditions. *Eur J Neurosci*, *34*(3), 507-516. doi:10.1111/j.1460-9568.2011.07772.x
- Spoelstra, K., & Daan, S. (2008). Effects of constant light on circadian rhythmicity in mice lacking functional cry genes: dissimilar from per mutants. *J Comp Physiol A Neuroethol Sens Neural Behav Physiol*, *194*(3), 235-242. doi:10.1007/s00359-007-0301-3
- Steinlechner, S., Jacobmeier, B., Scherbarth, F., Dernbach, H., Kruse, F., & Albrecht, U. (2002). Robust circadian rhythmicity of Per1 and Per2 mutant mice in constant light, and dynamics of Per1 and Per2 gene expression under long and short photoperiods. *J Biol Rhythms*, *17*(3), 202-209. doi:10.1177/074873040201700303
- Storch, K. F., Paz, C., Signorovitch, J., Raviola, E., Pawlyk, B., Li, T., & Weitz, C. J. (2007). Intrinsic circadian clock of the mammalian retina: importance for retinal processing of visual information. *Cell*, *130*(4), 730-741. doi:10.1016/j.cell.2007.06.045
- Szel, A., & Rohlich, P. (1992). Two cone types of rat retina detected by anti-visual pigment antibodies. *Exp Eye Res*, *55*(1), 47-52. doi:10.1016/0014-4835(92)90090-f
- Takahashi, J. S. (2017). Transcriptional architecture of the mammalian circadian clock. *Nat Rev Genet*, *18*(3), 164-179. doi:10.1038/nrg.2016.150
- Thompson, S., Foster, R. G., Stone, E. M., Sheffield, V. C., & Mrosovsky, N. (2008). Classical and melanopsin photoreception in irradiance detection: negative masking of locomotor activity by light. *Eur J Neurosci*, *27*(8), 1973-1979. doi:10.1111/j.1460-9568.2008.06168.x
- Thompson, S., Recker, A., Vogel, T. W., Kuburas, A., Owens, J. A., Sheffield, V. C., . . . Stone, E. M. (2010). Light aversion in mice depends on nonimage-forming irradiance detection. *Behav Neurosci*, *124*(6), 821-827. doi:10.1037/a0021568
- Thompson, S., Stasheff, S. F., Hernandez, J., Nylen, E., East, J. S., Kardon, R. H., . . . Stone, E. M. (2011). Different inner retinal pathways mediate rod-cone input in irradiance detection for the pupillary light reflex and regulation of behavioral state in mice. *Invest Ophthalmol Vis Sci*, *52*(1), 618-623. doi:10.1167/iovs.10-6146
- Tosini, G., Davidson, A. J., Fukuhara, C., Kasamatsu, M., & Castanon-Cervantes, O. (2007). Localization of a circadian clock in mammalian photoreceptors. *FASEB J*, *21*(14), 3866-3871. doi:10.1096/fj.07-8371com
- Tosini, G., & Menaker, M. (1996). Circadian rhythms in cultured mammalian retina. *Science*, *272*(5260), 419-421.
- van Diepen, H. C., Ramkisoensing, A., Peirson, S. N., Foster, R. G., & Meijer, J. H. (2013). Irradiance encoding in the suprachiasmatic nuclei by rod and cone photoreceptors. *FASEB J*, *27*(10), 4204-4212. doi:10.1096/fj.13-233098

- van Oosterhout, F., Fisher, S. P., van Diepen, H. C., Watson, T. S., Houben, T., VanderLeest, H. T., . . . Meijer, J. H. (2012). Ultraviolet light provides a major input to non-image-forming light detection in mice. *Curr Biol*, 22(15), 1397-1402. doi:10.1016/j.cub.2012.05.032
- von Schantz, M., Lucas, R. J., & Foster, R. G. (1999). Circadian oscillation of photopigment transcript levels in the mouse retina. *Brain Res Mol Brain Res*, 72(1), 108-114. doi:S0169328X99002090 [pii]
- Walmsley, L., Hanna, L., Mouland, J., Martial, F., West, A., Smedley, A. R., . . . Brown, T. M. (2015). Colour as a signal for entraining the mammalian circadian clock. *PLoS Biol*, 13(4), e1002127. doi:10.1371/journal.pbio.1002127
- PBIOLOGY-D-14-03915 [pii]
- Welsh, D. K., Takahashi, J. S., & Kay, S. A. (2010). Suprachiasmatic nucleus: cell autonomy and network properties. *Annu Rev Physiol*, 72, 551-577. doi:10.1146/annurev-physiol-021909-135919
- Wenzel, A., von Lintig, J., Oberhauser, V., Tanimoto, N., Grimm, C., & Seeliger, M. W. (2007). RPE65 is essential for the function of cone photoreceptors in NRL-deficient mice. *Invest Ophthalmol Vis Sci*, 48(2), 534-542. doi:10.1167/iovs.06-0652
- Yamazaki, S., Goto, M., & Menaker, M. (1999). No evidence for extraocular photoreceptors in the circadian system of the Syrian hamster. *J Biol Rhythms*, 14(3), 197-201. doi:10.1177/074873099129000605
- Yoo, S. H., Yamazaki, S., Lowrey, P. L., Shimomura, K., Ko, C. H., Buhr, E. D., . . . Takahashi, J. S. (2004). PERIOD2::LUCIFERASE real-time reporting of circadian dynamics reveals persistent circadian oscillations in mouse peripheral tissues. *Proc Natl Acad Sci U S A*, 101(15), 5339-5346. doi:10.1073/pnas.0308709101
